# Supplementary material for: Patient disposition using the Emergency Severity Index: a retrospective observational study at an interdisciplinary emergency department
Source: PubMed Central journal article supplement — BMJ Open. 2022 May 11;12(5):e057684. doi: 10.1136/bmjopen-2021-057684 (PMC9109098; doi:10.1136/bmjopen-2021-057684), 2022-05-11
Supplement: bmjopen-2021-057684.draft_revisions.pdf [file bmjopen-2021-057684.draft_revisions.pdf]

# BMJ Open

BMJ Open is committed to open peer review. As part of this commitment we make the peer review history of every article we publish publicly available.

When an article is published we post the peer reviewers' comments and the authors' responses online. We also post the versions of the paper that were used during peer review. These are the versions that the peer review comments apply to.

The versions of the paper that follow are the versions that were submitted during the peer review process. They are not the versions of record or the final published versions. They should not be cited or distributed as the published version of this manuscript.

BMJ Open is an open access journal and the full, final, typeset and author-corrected version of record of the manuscript is available on our site with no access controls, subscription charges or pay-per-view fees (<http://bmjopen.bmj.com>).

If you have any questions on BMJ Open's open peer review process please email [info.bmjopen@bmj.com](mailto:info.bmjopen@bmj.com)

# BMJ Open

## Prediction of patient disposition by Emergency Severity Index

|                               |                                                                                                                                                                                                                                                                                                                                                                                         |
|-------------------------------|-----------------------------------------------------------------------------------------------------------------------------------------------------------------------------------------------------------------------------------------------------------------------------------------------------------------------------------------------------------------------------------------|
| Journal:                      | <i>BMJ Open</i>                                                                                                                                                                                                                                                                                                                                                                         |
| Manuscript ID                 | bmjopen-2021-057684                                                                                                                                                                                                                                                                                                                                                                     |
| Article Type:                 | Original research                                                                                                                                                                                                                                                                                                                                                                       |
| Date Submitted by the Author: | 27-Sep-2021                                                                                                                                                                                                                                                                                                                                                                             |
| Complete List of Authors:     | Völk, Stefanie; LMU, Department of Neurology<br>Koedel, Uwe; LMU, Department of Neurology<br>Horster, Sophia; LMU, Emergency Department<br>Bayer, Andreas; LMU, Department of Anaesthesiology<br>D'Haese, Jan; LMU, Department of General, Visceral, and Transplantation Surgery<br>Pfister, Hans-Walter; LMU, Department of Neurology<br>Klein, Matthias; LMU, Department of Neurology |
| Keywords:                     | ACCIDENT & EMERGENCY MEDICINE, Adult intensive & critical care < ANAESTHETICS, Adult intensive & critical care < INTENSIVE & CRITICAL CARE                                                                                                                                                                                                                                              |
|                               |                                                                                                                                                                                                                                                                                                                                                                                         |

SCHOLARONE™  
Manuscripts

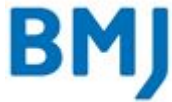

I, the Submitting Author has the right to grant and does grant on behalf of all authors of the Work (as defined in the below author licence), an exclusive licence and/or a non-exclusive licence for contributions from authors who are: i) UK Crown employees; ii) where BMJ has agreed a CC-BY licence shall apply, and/or iii) in accordance with the terms applicable for US Federal Government officers or employees acting as part of their official duties; on a worldwide, perpetual, irrevocable, royalty-free basis to BMJ Publishing Group Ltd ("BMJ") its licensees and where the relevant Journal is co-owned by BMJ to the co-owners of the Journal, to publish the Work in this journal and any other BMJ products and to exploit all rights, as set out in our [licence](#).

The Submitting Author accepts and understands that any supply made under these terms is made by BMJ to the Submitting Author unless you are acting as an employee on behalf of your employer or a postgraduate student of an affiliated institution which is paying any applicable article publishing charge ("APC") for Open Access articles. Where the Submitting Author wishes to make the Work available on an Open Access basis (and intends to pay the relevant APC), the terms of reuse of such Open Access shall be governed by a Creative Commons licence – details of these licences and which [Creative Commons](#) licence will apply to this Work are set out in our licence referred to above.

Other than as permitted in any relevant BMJ Author's Self Archiving Policies, I confirm this Work has not been accepted for publication elsewhere, is not being considered for publication elsewhere and does not duplicate material already published. I confirm all authors consent to publication of this Work and authorise the granting of this licence.

## Prediction of patient disposition by Emergency Severity Index

Stefanie Völk<sup>1</sup>, Uwe Koedel<sup>1</sup>, Sophia Horster<sup>2</sup>, Andreas Bayer<sup>3</sup>, Jan G. D'Haese<sup>4</sup>, Hans-Walter Pfister<sup>1</sup>, Matthias Klein<sup>1,2</sup>

(1) Department of Neurology, University Hospital, LMU Munich, Marchioninstr. 15, 81377 Munich, Germany

(2) Emergency Department, University Hospital, LMU Munich, Marchioninstr. 15, 81377 Munich, Germany

(3) Department of Anaesthesiology, University Hospital, LMU Munich, Marchioninstr. 15, 81377 Munich, Germany

(4) Department of General, Visceral, and Transplantation Surgery, University Hospital, LMU Munich, Marchioninstr. 15, 81377 Munich, Germany

**Authors:** Dr. Stefanie Völk, stefanie.voelk@med.uni-muenchen.de; Prof. Dr. Uwe Koedel, uwe.koedel@med.uni-muenchen.de; PD Dr. Sophia Horster, sophia.horster@med.uni-muenchen.de; Dr. Andreas Bayer, andreas.bayer@med.uni-muenchen.de; PD Dr. Jan G. D'Haese, jan.DHaese@med.uni-muenchen.de; Prof. Dr. Hans-Walter Pfister, hans-walter.pfister@med.uni-muenchen.de; Prof. Dr. Matthias Klein, matthias.klein@med.uni-muenchen.de.

**Corresponding author:** Prof. Dr. Matthias Klein, Department of Neurology, University Hospital, LMU Munich, Marchioninstr. 15, 81377 Munich, Germany. E-mail: matthias.klein@med.uni-muenchen.de. Tel. ++49 89 4400-76676. Fax ++49 89 4400-76671.

1  
2 **Conflict of interest:** The authors declare that they have no conflicts of interest regarding the  
3  
4 publication of this article.  
5

6 **Data:** Original data are available upon reasonable request.  
7

8 **Funding:** This research did not receive any specific grant from funding agencies in public,  
9  
10 commercial, or not-for-profit sectors.  
11

12 **Ethical approval:** The study was approved by the Ethics Committee of the University of Munich  
13  
14 (project number 18-409).  
15

16 **Key words:** Emergency severity index, resource allocation, priority of care, triage.  
17

18 **Author contributions:** Study concept and design were developed by SV and MK. Acquisition of  
19  
20 data was done by SV. MK, SH, AB, JD, UK and HWP were responsible for the interpretation of  
21  
22 data and critical revision of the manuscript.  
23  
24

25 **Acknowledgment:** We thank Edin Hedzic for his contribution to acquire the data.  
26  
27

28 **Patient and public involvement:** Patients and the public were not involved in the design, or  
29  
30 conduct, or reporting, or dissemination plans of our research.  
31  
32

33 **Word count abstract:** 237  
34

35 **Word count manuscript:** 2642  
36  
37  
38  
39  
40  
41  
42  
43  
44  
45  
46  
47  
48  
49  
50  
51  
52  
53  
54  
55  
56  
57  
58  
59  
60

## Abstract

*Objective:* Early patient disposition is crucial to prevent crowding in emergency departments (ED).

Our study aimed to characterize the need of in-house resources for patients treated in the ED according to the Emergency Severity Index (ESI) at the time point of triage.

*Methods:* We retrospectively analysed data of all patients who presented to the interdisciplinary ED of a tertiary care hospital in Munich, Germany, from 2014 to 2017 (n=113.693).

*Results:* Patient disposition varied according to ESI scores in combination with the chief complaint. Patients with low ESI scores were more likely to be admitted after treatment at the ED than patients with high ESI scores. Highly prioritized patients (ESI 1) mainly required admission to an intensive care unit (ICU, 27%), intermediate care unit (IMC, 37%) or immediate intervention (11%). In this critical patient group, 30% of patients with neurological or medical symptoms required immediate intensive care whereas only 17% of patients with surgical problems were admitted to an ICU. In general, patients with high ESI scores hardly ever needed intensive care or immediate intervention, but some patients with neurological or medical problems still required ICU or IMC treatment in this group.

*Conclusions:* Overall, ESI seems to be a useful tool to anticipate the need for specialized in-hospital resources upon arrival. Patients with symptoms pointing at neurological or medical problems need particular attention as ESI may fail to sufficiently predict the care facility level for this patient group.

*Key words:* Emergency severity index, resource allocation, priority of care, triage.

### Strengths and limitations of this study:

- Real-world data on a large number of emergency patients
- Clinical impact with suggestion of ESI triage as a promising tool to improve coordination of care by predicting type and amount of hospital beds required for specific ED patient groups
- Further evaluation of our single-centre analysis is needed

## Introduction

Keeping the patient flow in emergency departments (EDs) going is important to prevent (over)crowding. One of the crucial processes is to determine the most probable patient disposition as early as possible. This allows staff on the wards to get prepared even though patients still receive diagnostics before admission. Furthermore, in situations when patients in the ED with a high probability of admission to specific wards (such as general ward, intermediate care, intensive care) outnumber open beds, reallocation or early discharge of in-house patients could help to create resources long before the ED patient is ready to be admitted. Patients arriving at the ED usually undergo triage using standardized scores. These scores are designed to rapidly assess the acuteness of disease in emergency patients (1) and allow to allocate treatment priorities, which is especially important when demand for medical care exceeds disposable resources such as staff, space or medical equipment. The main goal of triage scores is to avoid waiting time that endangers patients with potential life-threatening diseases. In general, triage scores with five levels are considered to have a superior validity and reliability compared to those with three levels (2). Commonly used triage systems in EDs are the Manchester Triage System (MTS), the Australasian Triage Scale (ATS) and the Emergency Severity Index (ESI). ESI is a five-level triage algorithm that is frequently used in many European countries (3). Treatment priority according to ESI depends on severity of the disease and expected need of resources. Inter-observer reliability of ESI is considered high, reflected by the fact that there are no significant differences in triage by nurses and physicians (4, 5). Reliability may be moderate in some subgroups like in geriatric or paediatric patients (6-9), but overall, ESI is considered to be a valuable tool to assign acceptable maximum waiting times and to protect critical patients from being overlooked in overcrowded EDs. Here, we aimed to characterize the in-house resources needed for ED patients according to ESI scores at triage and the most likely medical discipline that is needed for the patient according to the chief complaint.

## Methods

A single centre retrospective analysis was conducted. Data of all patients who presented to the interdisciplinary ED of a tertiary care hospital in Munich, Germany, within three years was analysed (11/2014 until 10/2017). All patients initially underwent a triage process by an experienced and specifically trained nurse supervised by an attending emergency physician. ESI was used for triage of all patients as suggested by the published algorithm (3). Simultaneously, the main complaint was identified for each patient. At discharge from the ED, the discharge destination was documented.

Data of all patients was extracted according to ESI score (levels ESI 1, ESI 2, ESI 3, ESI 4 and ESI 5), the manner in which the patient reached the ED and discharge destination from the ED. Patient flow was analysed for admissions to ICU, IMC, standard wards, monitoring at the ED admission unit, discharge, transfer to other hospitals, patient denial of admission, lost to follow up (patients who left the ED without reporting to medical staff) and death in the ED. Subgroup analysis was performed for symptoms that prompted a health problem most likely related to one of nine specialities (internal medicine, trauma surgery, neurology, general surgery, otorhinolaryngology, urology, orthopaedics, gynaecology and neurosurgery).

Data is illustrated in numbers (n) and/or percentages. For statistical analysis, chi-square test of independence was used (SigmaPlot) and  $p < 0.05$  was considered significant. Bonferroni alpha correction was used for multiple comparisons. The study was approved by the Ethics Committee of the University of Munich (project number 18-409).

## Patient and public involvement

Patients and the public were not involved in the design, or conduct, or reporting, or dissemination plans of our research.



## Results

### *ESI levels and most frequent triage symptoms*

During the study period n=113.693 patients presented to the interdisciplinary ED. All patients underwent an initial assessment including ESI triage and identification of a main presenting symptom (Appendix A). Three percent of all patients (n=3050) were triaged with ESI 1, implying that they suffered from an immediate life-threatening health problem. Five percent were scored ESI 2 (n=5221), 42% (n=47484) were assigned to ESI 3, another 42% (n=47697) to ESI 4 and 9% (n=9843) to ESI 5. Overall, the most frequent chief complaints on presentation were abdominal pain (8%), limb injury (6%), and chest pain (5%) (Table 1).

### *Means of transport to the ED*

The manner in which patients reached the ED were via emergency service (30%), self-referral (61%), referral of a practitioner at an ambulatory care office (5%) and others (e.g. via police or referral from abroad) (4%). Patients with a high treatment priority according to ESI were more likely to present via the emergency service: 89% of ESI 1 patients and 68% of ESI 2 patients were taken to hospital by the emergency services compared to 15% for ESI 4 and 6% for ESI 5 (Figure 1A). Patients with a low treatment priority according to ESI, however, mainly presented on their own. Self-referrals were 86% for ESI 5 patients and 76% for ESI 4 patients compared to 50% for ESI 3, 22% for ESI 2 and 2% for ESI 1 (Figure 1A).

### *Hospital admissions*

The general admission rate was 39% (see Table 2 for admission rates according to specialty). High triage priority reflected by a low ESI level was associated with high probability of admission (Figure 1B). Admission rates were 96% for ESI 1, 80% for ESI 2, 53% for ESI 3, 22% for ESI 4, and 11% for ESI 5 patients (Figure 1B).

### *Required care facility levels of admitted patients*

Patients with ESI 1 and ESI 2 frequently required ICU or IMC (Figure 2). ESI 1 patients had the highest admission rates to ICU (27%), interventions (11%) or IMC (37%, including stroke unit, chest pain unit and emergency ward admission unit). Most patients assigned to ESI 4 and ESI 5 were discharged after treatment in the ED (76% and 86%) and only infrequently required ICU (ESI 4 0.1%, ESI 5 0.1%) or IMC (ESI 4 3.7%, ESI 5 1.3%). In numbers, nine patients triaged as ESI 5 and 59 patients triaged as ESI 4 needed intensive care. The patients who required intensive care despite initial triage of ESI 5 had presented with dehydration, headache, a common cold, suspected shunt infection (n=2) or problems not further specified at triage (n=4). Similarly, patients who were triaged ESI 4 and required intensive care mainly suffered from a symptom indicating an internal medical (n=33) or a neurological/neurosurgical problem (n=10). Typical triage symptoms in this subgroup were for example abdominal pain (n=8), reduced general condition (n=6), headache (n=4), chest pain (n=2), nausea/vomiting (n=2), dehydration (n=2) or airway problems (n=2).

### *Mortality in the ED*

Patients assessed to ESI 1 were at highest risk of death in the ED: 4% of all ESI 1 patients died in the ED. Four patients with ESI 4 deceased in the ED, all of them were suffering from medical problems such as heart failure (n=2), sepsis or hypovolemic shock. None of the patients appointed to ESI 5 died.

### *Analysis of medical subgroups*

Disciplines involved in the treatment according to the chief complaint were internal medicine, trauma surgery, neurology, general surgery, otorhinolaryngology, urology, orthopaedics, gynaecology and neurosurgery (Figure 1C). Patients assigned to the main conservative disciplines (internal medicine and neurology) were more likely to present via the emergency service (37%)

1  
2 than patients of the main surgical disciplines (trauma surgery and general surgery, 26%,  $p<0.001$ ).  
3  
4 For conservative disciplines, referrals via practitioners were more common than for surgical  
5  
6 disciplines (7% versus 3%,  $p<0.001$ ).  
7  
8  
9

10  
11 All in all, ESI triage scores were associated with admission rates (Table 2) as patients with  
12  
13 numerically low ESI scores had higher admission rates and contrariwise ( $p<0.01$ ). This held true for  
14  
15 all ESI subgroups of patients with symptoms assigned to internal medicine, trauma surgery,  
16  
17 neurology, otorhinolaryngology and general surgery ( $p<0.001$ ). In urology, orthopaedics,  
18  
19 gynaecology and neurosurgery, admission rates did not differ between ESI 1 and ESI 2, but the  
20  
21 absolute numbers of patients were low in these groups. In these disciplines differences in admission  
22  
23 rates between patients triaged ESI 2 and ESI 3 could also not be found. Furthermore, there were no  
24  
25 significant differences between ESI 1 and ESI 3 in orthopaedics and gynaecology, between ESI 1  
26  
27 and ESI 4 in orthopaedics and between ESI 4 and ESI 5 in neurosurgery.  
28  
29  
30  
31  
32  
33

34 Subgroup analysis showed, that the required in-house resources according to ESI differed between  
35  
36 the medical specialties (Figure 2). ESI 1 patients with surgical problems (trauma surgery and  
37  
38 general surgery) less often (17%) required immediate intensive care capacities than patients of  
39  
40 conservative disciplines (internal medicine and neurology; 30%) ( $p<0.001$ ). In turns, 19% of  
41  
42 surgical ESI 1 patients required immediate interventions such as surgery compared to 6% in the  
43  
44 conservative group ( $p<0.001$ ).  
45  
46  
47  
48  
49

### 50 *Patients with neurological symptoms*

51  
52 In neurology and neurosurgery, admission rates were above the average admission rate of 39%:  
53  
54 46% of neurological and 69% of neurosurgical patients needed admission. Of interest, neurological  
55  
56 and neurosurgical patients with low treatment priorities according to ESI still had high admission  
57  
58 rates (Table 2). Most important, admission rates for ESI 3, ESI 4 and ESI 5 patients to ICU and  
59  
60

1  
2 IMC were above average. Remarkably, five of the nine ESI 5 patients who required ICU presented  
3  
4 with a symptom that was suspicious for a neurological or neurosurgical problem.  
5  
6  
7

## 8 9 **Discussion**

10  
11 The main findings of our study were: (i) Low ESI scores were associated with a relatively high need  
12  
13 for intermediate care or intensive care. (ii) This was especially the case in patients with symptoms  
14  
15 assigned to neurology or internal medicine. (iii) Overall, patients with high ESI scores (ESI 4 or 5)  
16  
17 could be discharged in the majority of cases and hardly ever required intensive or intermediate care  
18  
19 (iv) with the exception of single patients with neurological symptoms who required ICU or IMC  
20  
21 treatment despite high ESI scores at admission.  
22  
23  
24  
25  
26  
27

28 The distribution of ESI levels in our study cohort is comparable to those previously described (3, 5).  
29  
30 Prioritized patients with numerically low ESI scores mainly presented via the emergency service  
31  
32 and patients with high ESI scores more often on their own. This high ambulance use in prioritized  
33  
34 patients goes along with the expected acuteness of the disease and the urgency of treatment. Our  
35  
36 data is supported by previous studies, showing that ambulance use is related to severity of injury or  
37  
38 illness and hospital admission (10, 11). However, ambulance use in low-acuity ED patients assessed  
39  
40 by ESI can still be found. One reason for this might be that patients already improved by the time of  
41  
42 arrival at the ED (12). Also, as a limitation of our study, association of ambulance use with pre-  
43  
44 existing morbidity or age of patients cannot be excluded.  
45  
46  
47  
48  
49

50  
51 According to our results, low ESI scores were associated with mortality in the ED, admission rate  
52  
53 and the necessity of ICU or IMC for most medical specialties. This reflects the acuteness of the  
54  
55 diseases in prioritised patients. There are only few other studies on the prediction of hospital  
56  
57 admission and mortality using ESI triage. One retrospective observation with fairly large numbers  
58  
59 of patients of four EDs (37.974 patients triaged with ESI and 34.258 patients triaged with MTS)  
60

1  
2 found that both ESI and MTS predicted necessity of hospital admission and that mortality was  
3  
4 associated with urgency categories of both triage systems (13). However, in the cited study,  
5  
6 differentiation for medical subgroups was not performed, triage results were missing in many  
7  
8 patients and the study period only involved a few weeks.  
9  
10

11  
12  
13  
14 One important finding of our subgroup analysis is the limited association of ESI triage with the  
15  
16 required level of in-hospital care in neurological and neurosurgical patients. In these subgroups,  
17  
18 admission rates were above average (especially for ESI 3, 4, and 5) and five out of nine ESI 5  
19  
20 patients, who required ICU, had neurological or neurosurgical problems, however, three of them  
21  
22 had already been stabilised at other hospitals and were primarily referred for consultation,  
23  
24 explaining their low triage priority at arrival. One important reason for these high admission rates  
25  
26 might be the limited emergency workup capacities of many neurological diseases which usually  
27  
28 lead to hospital admission for more elaborate investigations. Also, selection bias is likely as a large  
29  
30 number of neurological patients with medium or low priority ESI scores was referred to our ED by  
31  
32 practitioners (9% of ESI 3, 10% of ESI 4 and 8% of ESI 5 in neurological patients compared to 6%  
33  
34 of ESI 3, 5% of ESI 4 and 2% of ESI 5 in general). The relatively high rate of admissions to IMC is  
35  
36 in part a result of the need of stroke unit care in many of these patients. Likewise, patients with  
37  
38 onset of neurological symptoms >24h ago may often be assigned to ESI scores with low priority but  
39  
40 they can turn out to suffer from subacute stroke for example and require further treatment at a  
41  
42 stroke unit (IMC). The fact that these patients required IMC does, however, not necessarily mean  
43  
44 that the high triage scores (and longer waiting time) were associated with a medical risk to the  
45  
46 patient.  
47  
48  
49  
50  
51

52  
53  
54  
55 Recent studies showed that neurological aspects are underrepresented in the ESI triage system. For  
56  
57 some diseases like in sepsis, ESI is known to have a low validity and combination with shock index  
58  
59 or quick sepsis-related organ failure assessment (qSOFA) might improve validity and even  
60

1  
2 mortality (14, 15). Whether ESI triage for neurological patients might be improved by adding  
3 neurological scores, e.g. Glasgow Coma Scale (GCS) or the face arm speech test (FAST), still  
4 needs to be evaluated. One triage system recently designed for patients with neurological  
5 complaints is the Heidelberg Neurological Triage System (HEINTS) (16). The intention of this  
6 score was to identify neurological patients with urgent need for medical treatment, thereby reducing  
7 resource utilization and duration of treatment (16, 17). Interestingly, this very neuro-specific triage  
8 system has already been evaluated not only in a highly specialized neurological ED but also in an  
9 interdisciplinary emergency setting, showing promising results. However, study periods were short  
10 and the number of patients limited. Also, HEINTS consists of four levels, which might affect its  
11 applicability in large EDs that are usually using 5-level triage scores as standard (2). The authors  
12 made a great effort to integrate the score into ESI but this still needs evaluation (16).  
13  
14  
15  
16  
17  
18  
19  
20  
21  
22  
23  
24  
25  
26  
27  
28  
29

30 Although we were able to assess a high number of patients, data were acquired from a single centre  
31 ED. As a tertiary care university hospital located at the outer belt of the city with a large transplant  
32 centre, selection bias might have influenced the patient mix as a significant proportion of patients  
33 reports to the ED to seek specialized advice according to long-term treatment at the hospital. In  
34 turns, the setup allows specialized consultations, diagnostics and treatment for basically any  
35 specialty at the ED at any time. As a consequence of the extended workup in the ED, admission  
36 rates might be lower than in other hospitals.  
37  
38  
39  
40  
41  
42  
43  
44  
45  
46  
47

## 48 **Conclusion**

49 There are various approaches that aim to improve coordination of ED care by reducing time for  
50 triage, treatment and transfer of patients (18-21). Our work suggests that ESI might be a promising  
51 tool to improve coordination of care by predicting type and amount of hospital beds required for  
52 specific ED patient groups. Patients with symptoms pointing at neurological problems need  
53 particular attention as ESI failed to sufficiently predict the care facility level needed in this patient  
54  
55  
56  
57  
58  
59  
60

1  
2 group. Further studies are needed to evaluate whether ESI helps to coordinate ICU capacities or  
3  
4 paramedic networks concerning treatment time, patient satisfaction or outcome.  
5  
6  
7  
8  
9  
10  
11  
12  
13  
14  
15  
16  
17  
18  
19  
20  
21  
22  
23  
24  
25  
26  
27  
28  
29  
30  
31  
32  
33  
34  
35  
36  
37  
38  
39  
40  
41  
42  
43  
44  
45  
46  
47  
48  
49  
50  
51  
52  
53  
54  
55  
56  
57  
58  
59  
60

For peer review only

## References

1. Consensus statement on the triage of critically ill patients. Society of Critical Care Medicine Ethics Committee. *JAMA*. 1994;271(15):1200-3.
2. Kuriyama A, Urushidani S, Nakayama T. Five-level emergency triage systems: variation in assessment of validity. *Emerg Med J*. 2017;34(11):703-10.
3. Mirhaghi A, Heydari A, Mazlom R, Hasanzadeh F. Reliability of the Emergency Severity Index: Meta-analysis. *Sultan Qaboos Univ Med J*. 2015;15(1):e71-7.
4. Esmailian M, Zamani M, Azadi F, Ghasemi F. Inter-Rater Agreement of Emergency Nurses and Physicians in Emergency Severity Index (ESI) Triage. *Emerg (Tehran)*. 2014;2(4):158-61.
5. Fong RY, Glen WSS, Mohamed Jamil AK, Tam WWS, Kowitlawakul Y. Comparison of the Emergency Severity Index versus the Patient Acuity Category Scale in an emergency setting. *Int Emerg Nurs*. 2018.
6. Travers DA, Waller AE, Katznelson J, Agans R. Reliability and validity of the emergency severity index for pediatric triage. *Acad Emerg Med*. 2009;16(9):843-9.
7. Platts-Mills TF, Travers D, Biese K, McCall B, Kizer S, LaMantia M, et al. Accuracy of the Emergency Severity Index triage instrument for identifying elder emergency department patients receiving an immediate life-saving intervention. *Acad Emerg Med*. 2010;17(3):238-43.
8. Storm-Versloot MN, Ubbink DT, Kappelhof J, Luitse JS. Comparison of an informally structured triage system, the emergency severity index, and the manchester triage system to distinguish patient priority in the emergency department. *Acad Emerg Med*. 2011;18(8):822-9.
9. Grossmann FF, Zumbunn T, Frauchiger A, Delport K, Bingisser R, Nickel CH. At risk of undertriage? Testing the performance and accuracy of the emergency severity index in older emergency department patients. *Ann Emerg Med*. 2012;60(3):317-25 e3.
10. Ruger JP, Richter CJ, Lewis LM. Clinical and economic factors associated with ambulance use to the emergency department. *Acad Emerg Med*. 2006;13(8):879-85.
11. Bosia T, Malinowska A, Weigel K, Schmid F, Nickel CH, Bingisser R. Risk of adverse outcome in patients referred by emergency medical services in Switzerland. *Swiss Med Wkly*. 2017;147:w14554.



12. Pearson C, Kim DS, Mika VH, Imran Ayaz S, Millis SR, Dunne R, et al. Emergency department visits in patients with low acuity conditions: Factors associated with resource utilization. *Am J Emerg Med*. 2018;36(8):1327-31.
13. van der Wulp I, Schrijvers AJ, van Stel HF. Predicting admission and mortality with the Emergency Severity Index and the Manchester Triage System: a retrospective observational study. *Emerg Med J*. 2009;26(7):506-9.
14. Torabi M, Moeinaddini S, Mirafzal A, Rastegari A, Sadeghkhan N. Shock index, modified shock index, and age shock index for prediction of mortality in Emergency Severity Index level 3. *Am J Emerg Med*. 2016;34(11):2079-83.
15. Kwak H, Suh GJ, Kim T, Kwon WY, Kim KS, Jung YS, et al. Prognostic performance of Emergency Severity Index (ESI) combined with qSOFA score. *Am J Emerg Med*. 2018;36(10):1784-8.
16. Oßwald HM, Harenberg L, Jaschonek H, Mundiyanapurath S, Purruicker JC, Rauch G, et al. Development and validation of the Heidelberg Neurological Triage System (HEINTS). *Journal of Neurology*. 2019;266(11):2685-98.
17. Hoyer C, Stein P, Ebert A, Rausch HW, Nagel S, Eisele P, et al. Comparing Expert and Non-Expert Assessment of Patients Presenting with Neurological Symptoms to the Emergency Department: A Retrospective Observational Study. *Neuropsychiatr Dis Treat*. 2020;16:447-56.
18. Vegting IL, Nanayakkara PW, van Dongen AE, Vandewalle E, van Galen J, Kramer MH, et al. Analysing completion times in an academic emergency department: coordination of care is the weakest link. *Neth J Med*. 2011;69(9):392-8.
19. De Freitas L, Goodacre S, O'Hara R, Thokala P, Hariharan S. Interventions to improve patient flow in emergency departments: an umbrella review. *Emerg Med J*. 2018;35(10):626-37.
20. Lauks J, Mramor B, Baumgartl K, Maier H, Nickel CH, Bingisser R. Medical Team Evaluation: Effect on Emergency Department Waiting Time and Length of Stay. *PLoS One*. 2016;11(4):e0154372.
21. Villa S, Weber EJ, Polevoi S, Fee C, Maruoka A, Quon T. Decreasing triage time: effects of implementing a step-wise ESI algorithm in an EHR. *Int J Qual Health Care*. 2018;30(5):375-81.

1  
2  
3 **Figure 1: Analysis of the study population for manner of arrival (A), admission rate (B) and**  
4 **specialty according to the chief complaint (C).** Data of all patients (n=113.693) was analysed for  
5 triage results according to the Emergency Severity Index (ESI) and is illustrated for ESI 1, ESI 2,  
6 ESI 3, ESI 4 and ESI 5. Possible manners of arrival (A) were via the emergency service, by self-  
7 referral, via a practitioner and others (e.g. police). After treatment in the ED, patients were either  
8 admitted or discharged (B). For further analysis, patients were grouped to medical specialties  
9 according to their chief complaint (C): internal medicine, trauma surgery, neurology,  
10 otorhinolaryngology, urology, orthopaedics, gynaecology or neurosurgery.  
11  
12  
13  
14  
15  
16  
17  
18  
19  
20  
21  
22  
23  
24  
25  
26  
27  
28  
29  
30  
31  
32  
33  
34  
35  
36  
37  
38  
39  
40  
41  
42  
43  
44  
45  
46  
47  
48  
49  
50  
51  
52  
53  
54  
55  
56  
57  
58  
59  
60

1  
2 **Figure 2: Patient disposition in general and according to treating medical specialties.** Patient  
3  
4 disposition according to ESI for all patients (A) and for patients with chief complaints pointing at  
5  
6 problems related to internal medicine (B), neurology (C), trauma surgery (D) or general surgery (E).  
7  
8  
9  
10  
11  
12  
13  
14  
15  
16  
17  
18  
19  
20  
21  
22  
23  
24  
25  
26  
27  
28  
29  
30  
31  
32  
33  
34  
35  
36  
37  
38  
39  
40  
41  
42  
43  
44  
45  
46  
47  
48  
49  
50  
51  
52  
53  
54  
55  
56  
57  
58  
59  
60

For peer review only

**Table 1 Percentages of the ten most frequent leading symptoms in general, for admitted patients and for discharged patients.**

| Frequency of symptom | All patients                   | Admitted patients              | Discharged patients        |
|----------------------|--------------------------------|--------------------------------|----------------------------|
| 1                    | Abdominal pain (8%)            | Abdominal pain (9%)            | Abdominal pain (8%)        |
| 2                    | Limb injury (6%)               | Chest pain (6%)                | Limb injury (7%)           |
| 3                    | Chest pain (5%)                | Reduced general condition (6%) | Work accident (6%)         |
| 4                    | Work accident (4%)             | Airway problem (5%)            | Headache (4%)              |
| 5                    | Fall with injury (4%)          | Craniocerebral injury (4%)     | Fall with injury (4%)      |
| 6                    | Airway problem (4%)            | Fall with injury (4%)          | Chest pain (4%)            |
| 7                    | Headache (4%)                  | Other complaints (4%)          | Joint pain (3%)            |
| 8                    | Craniocerebral injury (3%)     | Limb injury (3%)               | Vertigo (3%)               |
| 9                    | Vertigo (3%)                   | Hemiparesis (3%)               | Craniocerebral injury (3%) |
| 10                   | Reduced general condition (3%) | Fever (3%)                     | Micturition problems (3%)  |

**Table 2 Admission rates and numbers of admitted patients analysed for medical specialty and Emergency Severity Index (ESI).**

| Discipline          | Admissions            |                       |                        |                        |                       |
|---------------------|-----------------------|-----------------------|------------------------|------------------------|-----------------------|
|                     | ESI 1 96%<br>(n=2898) | ESI 2 80%<br>(n=4162) | ESI 3 54%<br>(n=25333) | ESI 4 22%<br>(n=10321) | ESI 5 11%<br>(n=1096) |
| Internal medicine   | 99% (n=777)           | 72% (n=260)           | 62% (n=13062)          | 35% (n=3016)           | 21% (n=208)           |
| Trauma surgery      | 96% (n=874)           | 72% (n=260)           | 45% (n=3457)           | 13% (n=2054)           | 7% (n=260)            |
| Neurology           | 93% (n=725)           | 86% (n=1844)          | 46% (n=3662)           | 28% (n=1588)           | 20% (n=139)           |
| General surgery     | 93% (n=214)           | 78% (n=226)           | 57% (n=2690)           | 24% (n=1379)           | 11% (n=190)           |
| Otorhinolaryngology | 100% (n=13)           | 60% (n=70)            | 45% (n=822)            | 18% (n=970)            | 10% (n=151)           |
| Urology             | 90% (n=9)             | 48% (n=45)            | 40% (n=872)            | 20% (n=714)            | 14% (n=75)            |
| Orthopaedics        | 50% (n=2)             | 53% (n=10)            | 41% (n=329)            | 16% (n=546)            | 11% (n=113)           |
| Gynaecology         | 100% (n=5)            | 58% (n=14)            | 29% (n=285)            | 16% (n=275)            | 6% (n=19)             |
| Neurosurgery        | 95% (n=410)           | 84% (n=96)            | 68% (n=657)            | 54% (n=398)            | 54% (n=51)            |

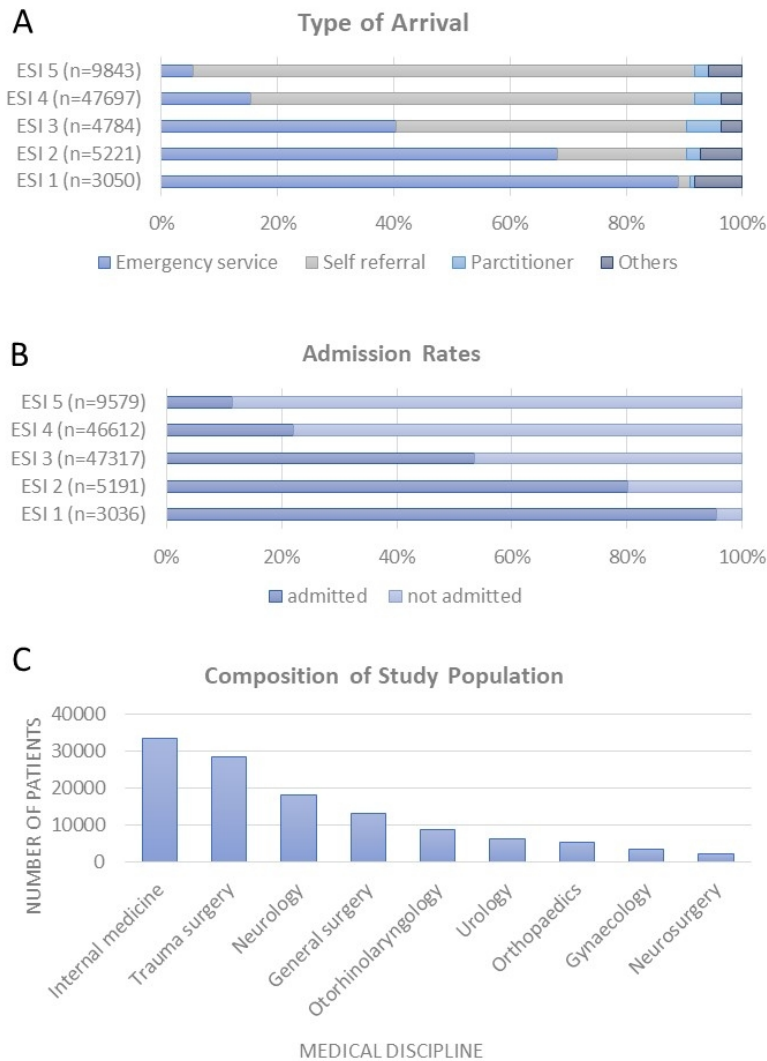

Figure 1: Analysis of the study population for manner of arrival (A), admission rate (B) and specialty according to the chief complaint (C). Data of all patients (n=113.693) was analysed for triage results according to the Emergency Severity Index (ESI) and is illustrated for ESI 1, ESI 2, ESI 3, ESI 4 and ESI 5. Possible manners of arrival (A) were via the emergency service, by self-referral, via a practitioner and others (e.g. police). After treatment in the ED, patients were either admitted or discharged (B). For further analysis, patients were grouped to medical specialties according to their chief complaint (C): internal medicine, trauma surgery, neurology, otorhinolaryngology, urology, orthopaedics, gynaecology or neurosurgery.

190x275mm (96 x 96 DPI)

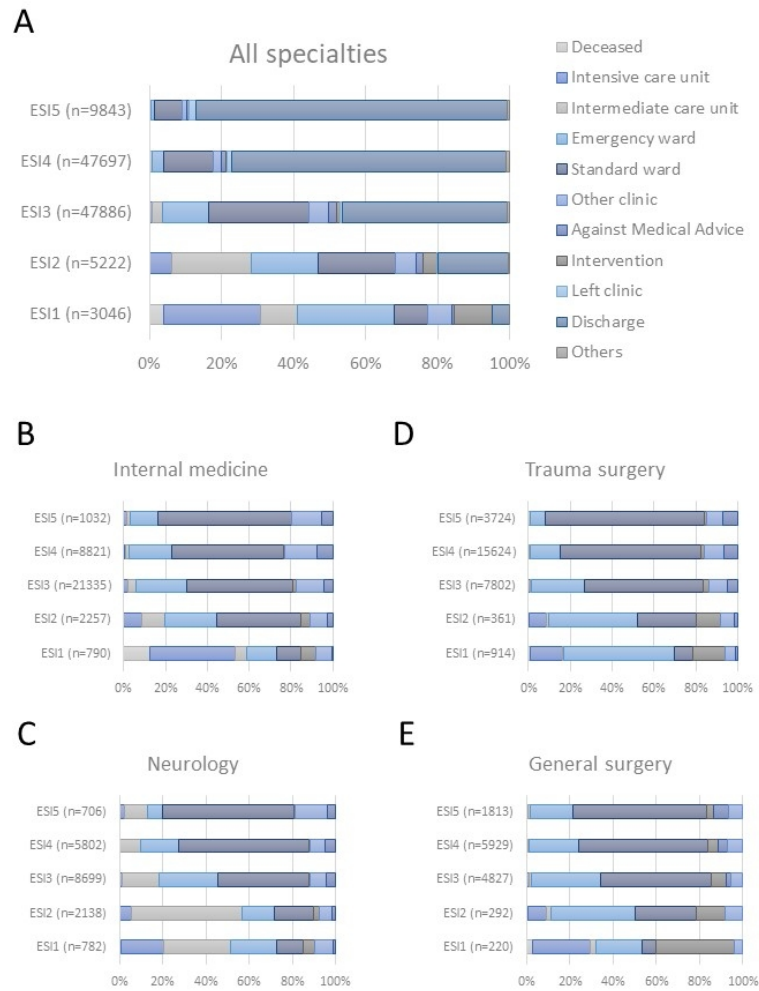

Figure 2: Patient disposition in general and according to treating medical specialties. Patient disposition according to ESI for all patients (A) and for patients with chief complaints pointing at problems related to internal medicine (B), neurology (C), trauma surgery (D) or general surgery (E).

190x275mm (96 x 96 DPI)

## Appendix A List of all symptoms available at triage for different specialties.

| Discipline          | Triage symptoms                                                                                                                                                                                                                                                                                                                                                                                                                                                                                           |
|---------------------|-----------------------------------------------------------------------------------------------------------------------------------------------------------------------------------------------------------------------------------------------------------------------------------------------------------------------------------------------------------------------------------------------------------------------------------------------------------------------------------------------------------|
| Internal medicine   | abdominal pain, airway problem, allergy and anaphylaxis, ascites and oedema, blood glucose derailment, cardiac arrhythmia, chest pain, coma, common cold, diarrhoea, dehydration, electrical accident, fever, flank pain, foreign material, gastrointestinal bleeding, hypertension, impaired consciousness, intoxication, jaundice, micturition problems, nausea and vomiting, other problems, problem of care, reduced general condition, resuscitation, skin and mucosal disease, swollen leg, syncope |
| Trauma surgery      | accident at work, back pain with radicular symptoms, back pain without radicular symptoms, craniocerebral injury, fall with injury, hand injury, joint problems, limb injury, muscle problem, needlestick injury, other problems, polytrauma, spinal injury, wound control                                                                                                                                                                                                                                |
| Neurology           | coma, double vision, facial palsy, gait disturbance, headache, hemiparesis, impaired consciousness, impaired vision, other problems, paraesthesia, paresis, problem of care, seizure, speech disorder, vertigo                                                                                                                                                                                                                                                                                            |
| General surgery     | acute abdominal pain, catheter and drainage complications, chest injury, flank pain, circulatory disturbance, craniocerebral injury, polytrauma, postoperative problems and controls, rectal and stoma problems, skin and soft tissue injuries, skin and soft tissue problems, transfer from other hospital                                                                                                                                                                                               |
| Otorhinolaryngology | bleeding, common cold, epistaxis, ear noise, ear pain, foreign material, hearing loss, nose injury, other problems, skin and mucosal disease, sore throat, vertigo                                                                                                                                                                                                                                                                                                                                        |
| Urology             | catheter exchange, flank pain, foreign material, micturition problem, other problems, scrotal pain, skin and mucosal disease, urological bleeding                                                                                                                                                                                                                                                                                                                                                         |
| Orthopaedics        | accident at work, back pain with radicular symptoms, back pain without radicular symptoms, craniocerebral injury, fall with injury, hand injury, joint problems, limb injury, muscle problem, needlestick injury, other problems, polytrauma, spinal injury, wound control                                                                                                                                                                                                                                |
| Gynaecology         | abdominal pain, ascites and oedema, foreign material, gynaecological bleeding, morning-after pill, micturition problem, other gynaecological problems, pregnancy complications, rape, reduced general condition, skin and mucosal disease                                                                                                                                                                                                                                                                 |
| Neurosurgery        | back pain, headache, impaired consciousness, other problems, reduced general condition, seizure, shunt-dysfunction, wound healing disorder                                                                                                                                                                                                                                                                                                                                                                |



1  
2  
3  
4  
5  
6  
7  
8  
9  
10  
11  
12  
13  
14  
15  
16  
17  
18  
19  
20  
21  
22  
23  
24  
25  
26  
27  
28  
29  
30  
31  
32  
33  
34  
35  
36  
37  
38  
39  
40  
41  
42  
43  
44  
45  
46  
47  
48  
49  
50  
51  
52  
53  
54  
55  
56  
57  
58  
59  
60

## STROBE Statement—checklist of items that should be included in reports of observational studies

|                              | Item No | Recommendation                                                                                                                                                                                                                                                                                                                                                                                                                                                         | Page No |
|------------------------------|---------|------------------------------------------------------------------------------------------------------------------------------------------------------------------------------------------------------------------------------------------------------------------------------------------------------------------------------------------------------------------------------------------------------------------------------------------------------------------------|---------|
| <b>Title and abstract</b>    | 1       | (a) Indicate the study's design with a commonly used term in the title or the abstract                                                                                                                                                                                                                                                                                                                                                                                 | OK      |
|                              |         | (b) Provide in the abstract an informative and balanced summary of what was done and what was found                                                                                                                                                                                                                                                                                                                                                                    | OK      |
| <b>Introduction</b>          |         |                                                                                                                                                                                                                                                                                                                                                                                                                                                                        |         |
| Background/rationale         | 2       | Explain the scientific background and rationale for the investigation being reported                                                                                                                                                                                                                                                                                                                                                                                   | OK      |
| Objectives                   | 3       | State specific objectives, including any prespecified hypotheses                                                                                                                                                                                                                                                                                                                                                                                                       | OK      |
| <b>Methods</b>               |         |                                                                                                                                                                                                                                                                                                                                                                                                                                                                        |         |
| Study design                 | 4       | Present key elements of study design early in the paper                                                                                                                                                                                                                                                                                                                                                                                                                | OK      |
| Setting                      | 5       | Describe the setting, locations, and relevant dates, including periods of recruitment, exposure, follow-up, and data collection                                                                                                                                                                                                                                                                                                                                        | OK      |
| Participants                 | 6       | (a) <i>Cohort study</i> —Give the eligibility criteria, and the sources and methods of selection of participants. Describe methods of follow-up<br><i>Case-control study</i> —Give the eligibility criteria, and the sources and methods of case ascertainment and control selection. Give the rationale for the choice of cases and controls<br><i>Cross-sectional study</i> —Give the eligibility criteria, and the sources and methods of selection of participants | OK      |
|                              |         | (b) <i>Cohort study</i> —For matched studies, give matching criteria and number of exposed and unexposed<br><i>Case-control study</i> —For matched studies, give matching criteria and the number of controls per case                                                                                                                                                                                                                                                 | N/A     |
| Variables                    | 7       | Clearly define all outcomes, exposures, predictors, potential confounders, and effect modifiers. Give diagnostic criteria, if applicable                                                                                                                                                                                                                                                                                                                               | OK      |
| Data sources/<br>measurement | 8*      | For each variable of interest, give sources of data and details of methods of assessment (measurement). Describe comparability of assessment methods if there is more than one group                                                                                                                                                                                                                                                                                   | OK      |
| Bias                         | 9       | Describe any efforts to address potential sources of bias                                                                                                                                                                                                                                                                                                                                                                                                              | OK      |
| Study size                   | 10      | Explain how the study size was arrived at                                                                                                                                                                                                                                                                                                                                                                                                                              | OK      |
| Quantitative variables       | 11      | Explain how quantitative variables were handled in the analyses. If applicable, describe which groupings were chosen and why                                                                                                                                                                                                                                                                                                                                           | OK      |
| Statistical methods          | 12      | (a) Describe all statistical methods, including those used to control for confounding                                                                                                                                                                                                                                                                                                                                                                                  | OK      |
|                              |         | (b) Describe any methods used to examine subgroups and interactions                                                                                                                                                                                                                                                                                                                                                                                                    | OK      |
|                              |         | (c) Explain how missing data were addressed                                                                                                                                                                                                                                                                                                                                                                                                                            | OK      |
|                              |         | (d) <i>Cohort study</i> —If applicable, explain how loss to follow-up was addressed<br><i>Case-control study</i> —If applicable, explain how matching of cases and controls was addressed<br><i>Cross-sectional study</i> —If applicable, describe analytical methods taking account of sampling strategy                                                                                                                                                              | OK      |
|                              |         | (e) Describe any sensitivity analyses                                                                                                                                                                                                                                                                                                                                                                                                                                  | OK      |

Continued on next page

| <b>Results</b>           |     |                                                                                                                                                                                                              |     |
|--------------------------|-----|--------------------------------------------------------------------------------------------------------------------------------------------------------------------------------------------------------------|-----|
| Participants             | 13* | (a) Report numbers of individuals at each stage of study—eg numbers potentially eligible, examined for eligibility, confirmed eligible, included in the study, completing follow-up, and analysed            | OK  |
|                          |     | (b) Give reasons for non-participation at each stage                                                                                                                                                         | N/A |
|                          |     | (c) Consider use of a flow diagram                                                                                                                                                                           | N/A |
| Descriptive data         | 14* | (a) Give characteristics of study participants (eg demographic, clinical, social) and information on exposures and potential confounders                                                                     | OK  |
|                          |     | (b) Indicate number of participants with missing data for each variable of interest                                                                                                                          | OK  |
|                          |     | (c) <i>Cohort study</i> —Summarise follow-up time (eg, average and total amount)                                                                                                                             | OK  |
| Outcome data             | 15* | <i>Cohort study</i> —Report numbers of outcome events or summary measures over time                                                                                                                          | OK  |
|                          |     | <i>Case-control study</i> —Report numbers in each exposure category, or summary measures of exposure                                                                                                         | OK  |
|                          |     | <i>Cross-sectional study</i> —Report numbers of outcome events or summary measures                                                                                                                           | OK  |
| Main results             | 16  | (a) Give unadjusted estimates and, if applicable, confounder-adjusted estimates and their precision (eg, 95% confidence interval). Make clear which confounders were adjusted for and why they were included | OK  |
|                          |     | (b) Report category boundaries when continuous variables were categorized                                                                                                                                    | OK  |
|                          |     | (c) If relevant, consider translating estimates of relative risk into absolute risk for a meaningful time period                                                                                             | OK  |
| Other analyses           | 17  | Report other analyses done—eg analyses of subgroups and interactions, and sensitivity analyses                                                                                                               | OK  |
| <b>Discussion</b>        |     |                                                                                                                                                                                                              |     |
| Key results              | 18  | Summarise key results with reference to study objectives                                                                                                                                                     | OK  |
| Limitations              | 19  | Discuss limitations of the study, taking into account sources of potential bias or imprecision. Discuss both direction and magnitude of any potential bias                                                   | OK  |
| Interpretation           | 20  | Give a cautious overall interpretation of results considering objectives, limitations, multiplicity of analyses, results from similar studies, and other relevant evidence                                   | OK  |
| Generalisability         | 21  | Discuss the generalisability (external validity) of the study results                                                                                                                                        | OK  |
| <b>Other information</b> |     |                                                                                                                                                                                                              |     |
| Funding                  | 22  | Give the source of funding and the role of the funders for the present study and, if applicable, for the original study on which the present article is based                                                | OK  |

\*Give information separately for cases and controls in case-control studies and, if applicable, for exposed and unexposed groups in cohort and cross-sectional studies.

**Note:** An Explanation and Elaboration article discusses each checklist item and gives methodological background and published examples of transparent reporting. The STROBE checklist is best used in conjunction with this article (freely available on the Web sites of PLoS Medicine at <http://www.plosmedicine.org/>, Annals of Internal Medicine at <http://www.annals.org/>, and Epidemiology at <http://www.epidem.com/>). Information on the STROBE Initiative is available at [www.strobe-statement.org](http://www.strobe-statement.org).

# BMJ Open

## Patient disposition using the Emergency Severity Index: a retrospective observational study at an interdisciplinary emergency department

|                                 |                                                                                                                                                                                                                                                                                                                                                                                                                                                                                                                         |
|---------------------------------|-------------------------------------------------------------------------------------------------------------------------------------------------------------------------------------------------------------------------------------------------------------------------------------------------------------------------------------------------------------------------------------------------------------------------------------------------------------------------------------------------------------------------|
| Journal:                        | <i>BMJ Open</i>                                                                                                                                                                                                                                                                                                                                                                                                                                                                                                         |
| Manuscript ID                   | bmjopen-2021-057684.R1                                                                                                                                                                                                                                                                                                                                                                                                                                                                                                  |
| Article Type:                   | Original research                                                                                                                                                                                                                                                                                                                                                                                                                                                                                                       |
| Date Submitted by the Author:   | 21-Feb-2022                                                                                                                                                                                                                                                                                                                                                                                                                                                                                                             |
| Complete List of Authors:       | Völk, Stefanie; LMU, Department of Neurology, University Hospital Koedel, Uwe; LMU, Department of Neurology, University Hospital Horster, Sophia; LMU, Emergency Department, University Hospital Bayer, Andreas; LMU, Department of Anaesthesiology, University Hospital D'Haese, Jan; LMU, Department of General, Visceral and Transplantation Surgery, University Hospital Pfister, Hans-Walter; LMU, Department of Neurology, University Hospital Klein, Matthias; LMU, Department of Neurology, University Hospital |
| <b>Primary Subject Heading</b>: | Emergency medicine                                                                                                                                                                                                                                                                                                                                                                                                                                                                                                      |
| Secondary Subject Heading:      | Emergency medicine                                                                                                                                                                                                                                                                                                                                                                                                                                                                                                      |
| Keywords:                       | Adult intensive & critical care < ANAESTHETICS, Adult intensive & critical care < INTENSIVE & CRITICAL CARE, ACCIDENT & EMERGENCY MEDICINE                                                                                                                                                                                                                                                                                                                                                                              |
|                                 |                                                                                                                                                                                                                                                                                                                                                                                                                                                                                                                         |

SCHOLARONE™  
Manuscripts

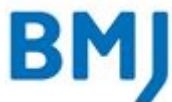

I, the Submitting Author has the right to grant and does grant on behalf of all authors of the Work (as defined in the below author licence), an exclusive licence and/or a non-exclusive licence for contributions from authors who are: i) UK Crown employees; ii) where BMJ has agreed a CC-BY licence shall apply, and/or iii) in accordance with the terms applicable for US Federal Government officers or employees acting as part of their official duties; on a worldwide, perpetual, irrevocable, royalty-free basis to BMJ Publishing Group Ltd ("BMJ") its licensees and where the relevant Journal is co-owned by BMJ to the co-owners of the Journal, to publish the Work in this journal and any other BMJ products and to exploit all rights, as set out in our [licence](#).

The Submitting Author accepts and understands that any supply made under these terms is made by BMJ to the Submitting Author unless you are acting as an employee on behalf of your employer or a postgraduate student of an affiliated institution which is paying any applicable article publishing charge ("APC") for Open Access articles. Where the Submitting Author wishes to make the Work available on an Open Access basis (and intends to pay the relevant APC), the terms of reuse of such Open Access shall be governed by a Creative Commons licence – details of these licences and which [Creative Commons](#) licence will apply to this Work are set out in our licence referred to above.

Other than as permitted in any relevant BMJ Author's Self Archiving Policies, I confirm this Work has not been accepted for publication elsewhere, is not being considered for publication elsewhere and does not duplicate material already published. I confirm all authors consent to publication of this Work and authorise the granting of this licence.

1  
2  
3  
4  
5  
6  
7  
8  
9  
10  
11  
12  
13  
14  
15  
16  
17  
18  
19  
20  
21  
22  
23  
24  
25  
26  
27  
28  
29  
30  
31  
32  
33

**Patient disposition using the Emergency Severity Index: a retrospective  
observational study at an interdisciplinary emergency department**

Stefanie Völk<sup>1</sup>, Uwe Koedel<sup>1</sup>, Sophia Horster<sup>2</sup>, Andreas Bayer<sup>3</sup>, Jan G. D'Haese<sup>4</sup>, Hans-  
Walter Pfister<sup>1</sup>, Matthias Klein<sup>1,2</sup>

(1) Department of Neurology, University Hospital, LMU Munich, Marchioninstr. 15,  
81377 Munich, Germany

(2) Emergency Department, University Hospital, LMU Munich, Marchioninstr. 15,  
81377 Munich, Germany

(3) Department of Anaesthesiology, University Hospital, LMU Munich, Marchioninstr.  
15, 81377 Munich, Germany

(4) Department of General, Visceral, and Transplantation Surgery, University Hospital,  
LMU Munich, Marchioninstr. 15, 81377 Munich, Germany

34  
35  
36  
37  
38  
39  
40  
41  
42  
43  
44  
45  
46  
47

**Authors:** Dr. Stefanie Völk, stefanie.voelk@med.uni-muenchen.de; Prof. Dr. Uwe Koedel, uwe.koedel@med.uni-muenchen.de; PD Dr. Sophia Horster, sophia.horster@med.uni-muenchen.de; Dr. Andreas Bayer, andreas.bayer@med.uni-muenchen.de; PD Dr. Jan G. D'Haese, jan.DHaese@med.uni-muenchen.de; Prof. Dr. Hans-Walter Pfister, hans-walter.pfister@med.uni-muenchen.de; Prof. Dr. Matthias Klein, matthias.klein@med.uni-muenchen.de.

48  
49  
50  
51  
52  
53  
54  
55  
56

**Corresponding author:** Prof. Dr. Matthias Klein, Department of Neurology, University Hospital, LMU Munich, Marchioninstr. 15, 81377 Munich, Germany. E-mail: matthias.klein@med.uni-muenchen.de. Tel. ++49 89 4400-76676. Fax ++49 89 4400-76671.

57  
58

**Word count abstract:** 269

59  
60

**Word count manuscript:** 2984

## ABSTRACT

**Objectives:** Early patient disposition is crucial to prevent crowding in emergency departments (ED). Our study aimed to characterize the need of in-house resources for patients treated in the ED according to the Emergency Severity Index (ESI) and the presenting complaint at the time point of triage.

**Design:** A retrospective single centre study was conducted.

**Setting:** Data of all patients who presented to the interdisciplinary ED of a tertiary care hospital in Munich, Germany, from 2014 to 2017 was analysed.

**Participants:** n=113.694 patients were included.

**Measures:** ESI score, medical specialty according to the chief complaint, mode of arrival, admission rates and discharge destination from the ED were evaluated.

**Results:** Patient disposition varied according to ESI scores in combination with the chief complaint. Patients with low ESI scores were more likely to be admitted after treatment in the ED than patients with high ESI scores. Highly prioritized patients (ESI 1) mainly required admission to an intensive care unit (ICU, 27%), intermediate care unit (IMC, 37%) or immediate intervention (11%). In this critical patient group, 30% of patients with neurological or medical symptoms required immediate intensive care whereas only 17% of patients with surgical problems were admitted to an ICU. A significant number of patients (particularly with neurological or medical problems) required hospital (and in some cases even ICU or IMC) admission despite high ESI scores.

**Conclusions:** Overall, ESI seems to be a useful tool to anticipate the need for specialized in-hospital resources upon arrival. Patients with symptoms pointing at neurological or medical problems need particular attention as ESI may fail to sufficiently predict the care facility level for this patient group.

**Key words:** Emergency severity index, resource allocation, priority of care, triage.

### Strengths and limitations of this study:

- This is a single centre study on a large number of emergency patients (n=113.694).
- ESI in combination with the medical specialty of the chief complaint was assessed for the prediction of type and amount of required hospital beds.
- Data is limited on ESI and required in-house resources; other triage scales or resource consumption within the emergency department were not assessed.

### INTRODUCTION

Keeping the patient flow in emergency departments (EDs) going is important to prevent (over)crowding. One of the crucial processes is to determine the most probable patient disposition as early as possible. This allows staff on the wards to get prepared even though patients still receive diagnostics before admission. Furthermore, in situations when patients in the ED with a high probability of admission to specific wards (such as general ward, intermediate care, intensive care) outnumber available beds, reallocation or early discharge of in-house patients could help to create resources long before the ED patient is ready to be admitted. Patients arriving at the ED usually undergo triage using standardized scores. These scores are designed to rapidly assess the acuteness of the disease and allow to allocate treatment priorities, which is especially important when demand for medical care exceeds disposable resources such as staff, space or medical equipment.<sup>1</sup>

The main purpose of triage scores is to avoid waiting time that endangers patients with potential life-threatening diseases. In general, triage scores with five levels are considered to have a superior validity and reliability compared to those with three levels.<sup>2</sup> Commonly used five-level triage systems in EDs are the Australasian Triage Scale (ATS), the Manchester Triage System (MTS), the Canadian Triage and Acuity Scale (CTAS) and the Emergency Severity Index (ESI). Initially, the development of the ATS in Australia was the basis for the MTS used in Great Britain and for the CTAS in Canada.<sup>3-5</sup> ESI is also a five-level triage algorithm which was developed in the late 1990s and is nowadays frequently

1 used in many European countries.<sup>6,7</sup> Treatment priority according to ESI depends on  
2 severity of the disease and expected need of resources. Inter-observer reliability of ESI is  
3 considered high, reflected by the fact that there are no significant differences in triage by  
4 nurses and physicians.<sup>8,9</sup> Reliability may be moderate in some subgroups like in geriatric  
5 or paediatric patients,<sup>10-13</sup> but overall, ESI is considered to be a valuable tool to assign  
6 acceptable maximum waiting times and to protect critical patients from being overlooked in  
7 overcrowded EDs. Here, we aimed to characterize the in-house resources needed for ED  
8 patients according to ESI scores at triage and the most likely medical discipline that is  
9 needed for the patient according to the chief complaint.  
10  
11  
12  
13  
14  
15  
16  
17  
18  
19  
20  
21  
22  
23

## 24 **METHODS**

25 A single centre retrospective analysis was conducted. Data of all patients who presented  
26 to the interdisciplinary ED of a tertiary care hospital in Munich, Germany, within three  
27 years was analysed (11/2014 until 10/2017). All patients initially underwent a triage  
28 process by an experienced and specifically trained nurse supervised by an attending  
29 emergency physician. ESI was used for triage of all patients as suggested by the  
30 published algorithm.<sup>6</sup> Simultaneously, the main complaint was identified for each patient.  
31 At discharge from the ED, the discharge destination was documented.  
32  
33  
34  
35  
36  
37  
38  
39  
40  
41  
42  
43  
44  
45

46 Data of all patients was extracted according to ESI score (levels ESI 1, ESI 2, ESI 3, ESI 4  
47 and ESI 5), the manner in which the patient reached the ED and discharge destination  
48 from the ED. Patient flow was analysed for admissions to ICU, IMC, standard wards,  
49 monitoring at the emergency ward, intervention, transfer to other hospitals, discharge,  
50 discharge against medical advice, lost to follow up (patients who left the ED without  
51 reporting to medical staff), and death in the ED. Subgroup analysis was performed for  
52 symptoms that prompted a health problem most likely related to one of nine specialities  
53  
54  
55  
56  
57  
58  
59  
60



(internal medicine, trauma surgery, neurology, general surgery, otorhinolaryngology, urology, orthopaedics, gynaecology and neurosurgery).

Data is illustrated in numbers (n) and/or percentages. For statistical analysis, chi-square test of independence was used (SigmaPlot) and  $p < 0.05$  was considered significant.

Bonferroni alpha correction was applied for multiple comparisons (statistics on admissions according to ESI, p-values  $< 0.005$  were considered significant). All data was anonymised before the authors accessed them. The study was approved by the Ethics Committee of the University of Munich (project number 18-409).

### **Patient and public involvement**

Patients and the public were not involved in the design, or conduct, or reporting, or dissemination plans of our research.

## **RESULTS**

### **ESI levels and most frequent triage symptoms**

During the study period  $n = 113\,694$  patients presented to the interdisciplinary ED. All patients underwent an initial assessment including ESI triage and identification of a main presenting symptom (supplemental material). Three percent of all patients ( $n = 3046$ ) were triaged with ESI 1, implying that they suffered from an immediate life-threatening health problem. Five percent were scored ESI 2 ( $n = 5222$ ), 42% ( $n = 47886$ ) were assigned to ESI 3, another 42% ( $n = 47697$ ) to ESI 4 and 7% ( $n = 9843$ ) to ESI 5. Overall, the most frequent chief complaints on presentation were abdominal pain (8%), limb injury (6%), and chest pain (5%) (Table 1).

### **Table 1 Percentages of the ten most frequent chief complaints.**

| Rank of symptom frequency | All patients                   | Admitted patients              | Discharged patients        |
|---------------------------|--------------------------------|--------------------------------|----------------------------|
| 1                         | Abdominal pain (8%)            | Abdominal pain (9%)            | Abdominal pain (8%)        |
| 2                         | Limb injury (6%)               | Chest pain (6%)                | Limb injury (7%)           |
| 3                         | Chest pain (5%)                | Reduced general condition (6%) | Work accident (6%)         |
| 4                         | Work accident (4%)             | Airway problem (5%)            | Headache (4%)              |
| 5                         | Fall with injury (4%)          | Craniocerebral injury (4%)     | Fall with injury (4%)      |
| 6                         | Airway problem (4%)            | Fall with injury (4%)          | Chest pain (4%)            |
| 7                         | Headache (4%)                  | Other complaints (4%)          | Joint pain (3%)            |
| 8                         | Craniocerebral injury (3%)     | Limb injury (3%)               | Vertigo (3%)               |
| 9                         | Vertigo (3%)                   | Hemiparesis (3%)               | Craniocerebral injury (3%) |
| 10                        | Reduced general condition (3%) | Fever (3%)                     | Micturition problems (3%)  |

### Means of transport to the ED

The manner in which patients reached the ED were via emergency service (30%), self-referral (61%), referral of a practitioner at an ambulatory care office (5%) and others (e.g. via police or referral from abroad) (4%). Patients with a high treatment priority according to ESI were more likely to present via the emergency service: 89% of ESI 1 patients and 68% of ESI 2 patients were taken to hospital by the emergency services compared to 15% for ESI 4 and 6% for ESI 5 (Figure 1A). Patients with a low treatment priority according to ESI, however, mainly presented on their own. Self-referrals were 86% for ESI 5 patients and 76% for ESI 4 patients compared to 50% for ESI 3, 22% for ESI 2 and 2% for ESI 1 (Figure 1A).

### Hospital admissions

The general admission rate was 39%, but differed in a subgroup analysis according to the responsible specialty group of the presenting complaint (Table 2). High triage priority reflected by a low ESI level was associated with high probability of admission (Figure 1B). Admission rates were 96% for ESI 1, 80% for ESI 2, 54% for ESI 3, 22% for ESI 4, and 11% for ESI 5 patients (Figure 1B).

**Table 2 Admission rates (%) and total numbers of admitted patients (n) analysed for specialty groups and Emergency Severity Index (ESI).**

| Specialty           | Admission<br>ESI 1 | Admission<br>ESI 2 | Admission<br>ESI 3 | Admission<br>ESI 4 | Admission<br>ESI 5 |
|---------------------|--------------------|--------------------|--------------------|--------------------|--------------------|
| All specialties     | 96%<br>(n=2898)    | 80%<br>(n=4162)    | 54%<br>(n=25333)   | 22%<br>(n=10321)   | 11%<br>(n=1096)    |
| Internal medicine   | 99%<br>(n=777)     | 80%<br>(n=1791)    | 62%<br>(n=13062)   | 35%<br>(n=3016)    | 21%<br>(n=208)     |
| Trauma surgery      | 96%<br>(n=874)     | 72%<br>(n=260)     | 45%<br>(n=3457)    | 13%<br>(n=2054)    | 7%<br>(n=260)      |
| Neurology           | 93%<br>(n=725)     | 86%<br>(n=1844)    | 46%<br>(n=3662)    | 28%<br>(n=1588)    | 20%<br>(n=139)     |
| General surgery     | 93%<br>(n=214)     | 78%<br>(n=226)     | 57%<br>(n=2690)    | 24%<br>(n=1379)    | 11%<br>(n=190)     |
| Otorhinolaryngology | 100%<br>(n=13)     | 60%<br>(n=70)      | 45%<br>(n=822)     | 18%<br>(n=970)     | 10%<br>(n=151)     |
| Urology             | 90%<br>(n=9)       | 48%<br>(n=45)      | 40%<br>(n=872)     | 20%<br>(n=714)     | 14%<br>(n=75)      |
| Orthopaedics        | 50%<br>(n=2)       | 53%<br>(n=10)      | 41%<br>(n=329)     | 16%<br>(n=546)     | 11%<br>(n=113)     |
| Gynaecology         | 100%<br>(n=5)      | 58%<br>(n=14)      | 29%<br>(n=285)     | 16%<br>(n=275)     | 6%<br>(n=19)       |
| Neurosurgery        | 95%<br>(n=410)     | 84%<br>(n=96)      | 68%<br>(n=657)     | 54%<br>(n=398)     | 54%<br>(n=51)      |

### Required care facility levels of admitted patients

1  
2 Patients with ESI 1 and ESI 2 frequently required ICU or IMC (Figure 2). ESI 1 patients  
3  
4 had the highest admission rates to ICU (27%), interventions (11%) or IMC (37%, including  
5  
6 stroke unit, chest pain unit and emergency ward admission unit). Most patients assigned to  
7  
8 ESI 4 and ESI 5 were discharged after treatment in the ED (76% and 86%) and only  
9  
10 infrequently required ICU (ESI 4 0.1%, ESI 5 0.1%) or IMC (ESI 4 3.7%, ESI 5 1.3%). In  
11  
12 numbers, nine patients triaged to ESI 5 and 59 patients triaged to ESI 4 needed intensive  
13  
14 care. The patients who required intensive care despite initial triage to ESI 5 had presented  
15  
16 with dehydration, headache, a common cold, suspected shunt infection (n=2) or problems  
17  
18 not further specified at triage (n=4). Similarly, patients who were triaged to ESI 4 and  
19  
20 required intensive care mainly suffered from a symptom indicating an internal medical  
21  
22 (n=33) or a neurological/neurosurgical problem (n=10). Typical triage symptoms in this  
23  
24 subgroup were for example abdominal pain (n=8), reduced general condition (n=6),  
25  
26 headache (n=4), chest pain (n=2), nausea/vomiting (n=2), dehydration (n=2) or airway  
27  
28 problems (n=2).  
29  
30  
31  
32  
33  
34  
35

### 36 **Mortality in the ED**

37  
38 Patients assessed to ESI 1 were at highest risk of death in the ED: 4% of all ESI 1 patients  
39  
40 died in the ED. Four patients with ESI 4 deceased in the ED, all of them were suffering  
41  
42 from medical problems such as heart failure (n=2), sepsis or hypovolemic shock. None of  
43  
44 the patients appointed to ESI 5 died.  
45  
46  
47  
48  
49

### 50 **Analysis of medical subgroups**

51  
52 Specialty groups involved in the treatment according to the chief complaint were internal  
53  
54 medicine, trauma surgery, neurology, general surgery, otorhinolaryngology, urology,  
55  
56 orthopaedics, gynaecology and neurosurgery (Figure 1C). Patients assigned to the main  
57  
58 conservative disciplines (internal medicine and neurology) were more likely to present via  
59  
60

1  
2 the emergency service (37%) than patients of the main surgical disciplines (trauma  
3 surgery and general surgery, 26%,  $p<0.001$ ). For conservative disciplines, referrals via  
4 practitioners were more common than for surgical disciplines (7% versus 3%,  $p<0.001$ ).  
5  
6  
7  
8  
9

10  
11 All in all, ESI triage scores were associated with admission rates (Table 2) as patients with  
12 numerically low ESI scores had higher admission rates and contrariwise ( $p<0.001$  for all  
13 single comparisons). This held true for all ESI subgroups of patients with symptoms  
14 assigned to internal medicine, trauma surgery, neurology, otorhinolaryngology and general  
15 surgery ( $p<0.001$  for all single comparisons). In urology, orthopaedics, gynaecology and  
16 neurosurgery, admission rates did not differ between ESI 1 and ESI 2, but the absolute  
17 numbers of patients were low in these groups. In urology and orthopaedics differences in  
18 admission rates between patients triaged to ESI 2 and ESI 3 could also not be found.  
19  
20 Furthermore, there were no significant differences between ESI 1 and ESI 3 or ESI 4 in  
21 orthopaedics, ESI 3 or ESI 4 and ESI 5 in neurosurgery.  
22  
23  
24  
25  
26  
27  
28  
29  
30  
31  
32  
33  
34  
35

36 Subgroup analysis showed, that the required in-house resources according to ESI differed  
37 between the medical specialties (Figure 2). ESI 1 patients with surgical problems (trauma  
38 surgery and general surgery) less often (17%) required immediate intensive care  
39 capacities than patients of conservative disciplines (internal medicine and neurology; 30%)  
40 ( $p<0.001$ ). In turns, 19% of surgical ESI 1 patients required immediate interventions such  
41 as surgery compared to 6% in the conservative group ( $p<0.001$ ).  
42  
43  
44  
45  
46  
47  
48  
49  
50  
51

### 52 **Patients with neurological symptoms**

53  
54 In neurology and neurosurgery, admission rates were above the average admission rate of  
55 39%: 46% of neurological and 69% of neurosurgical patients needed admission. Of  
56  
57  
58  
59  
60 interest, neurological and neurosurgical patients with low treatment priorities according to

1  
2 ESI still had high admission rates (Table 2). Most important, admission rates for ESI 3, ESI  
3  
4 4 and ESI 5 patients to ICU and IMC were above average. Remarkably, five of the nine  
5  
6 ESI 5 patients who required ICU presented with a symptom that was suspicious for a  
7  
8 neurological or neurosurgical problem.  
9

## 10 11 12 13 **DISCUSSION**

14  
15 The main findings of our study were: (i) ESI scores were associated with mode of arrival,  
16  
17 mortality in the ED and need for admission, (ii) individual patients required even  
18  
19 intermediate or intensive care despite high ESI scores, (iii) the predicative value of ESI  
20  
21 was high for most specialty subgroups (except urology, orthopaedics, gynaecology, and  
22  
23 neurosurgery) and (iv) a significant number of patients with high ESI scores required  
24  
25 admission when the chief complaint pointed at a neurosurgical, neurological and medical  
26  
27 problem.  
28  
29  
30  
31

32  
33  
34 The distribution of ESI levels in our study cohort is comparable to those previously  
35  
36 described.<sup>6 9</sup> We observed an association of ESI with mode of arrival, which goes along  
37  
38 with the expected urgency of treatment and is supported by literature, showing that  
39  
40 ambulance use is related to severity of injury or illness.<sup>14 15</sup> Regarding hospital admission  
41  
42 and mortality, one retrospective observation with fairly large numbers of patients of four  
43  
44 EDs (37.974 patients triaged with ESI and 34.258 patients triaged with MTS) found that  
45  
46 both ESI and MTS predicted the necessity of hospital admission and mortality, which is in  
47  
48 accordance with our data.<sup>16</sup> However, in this study, triage results were missing in many  
49  
50 patients, the study period only involved a few weeks and there was no differentiation for  
51  
52 specialties. From a general point of view, besides ESI and MTS also other triage scales  
53  
54 are known to predict outcomes including mortality, hospital admission and resource  
55  
56  
57  
58  
59  
60

1  
2 consumption within the ED but numbers were generally low and the relevance of the chief  
3  
4 complaint was not assessed in most studies.<sup>17</sup>  
5  
6  
7

8  
9 Remarkably, admissions (even to intermediate or intensive care) in supposedly low-acuity  
10  
11 ED patients assessed by ESI were observed. This is of particular interest in times of  
12  
13 overcrowded EDs, when critics and politicians claim an inappropriate use of emergency  
14  
15 resources by patients with low treatment priority. Our data shows that less urgent triage  
16  
17 scores do not necessarily argue for an inappropriate attendance of an ED as often  
18  
19 supposed in political discussions on emergency resources. For example, in Australia the  
20  
21 ATS is not only used to assess treatment priority, but it is also the basis of Urgency  
22  
23 Related Groups and thereby essential for the ED funding in the country.<sup>3</sup> Furthermore,  
24  
25 even in the group of ED patients who are not admitted, a significant amount of medical  
26  
27 support has to be applied within the ED to many of these patients to ensure a safe  
28  
29 discharge home. One reason for the need of an admission despite a high ESI score might  
30  
31 be that patients presenting with subacute complaints may often be assigned to ESI scores  
32  
33 with low priority but might turn out to suffer from electrolyte disturbance or subacute stroke  
34  
35 (just to mention examples) and require further treatment at an IMC or stroke unit. The fact  
36  
37 that these patients require IMC, however, does not necessarily mean that the high triage  
38  
39 scores expose them to a medical risk within the ED. Reasons for ambulance use despite  
40  
41 high ESI scores could be the recovery of patients by the time of triage as well as  
42  
43 immobility due to age or pre-existing illness.<sup>18</sup> All in all, our data show that a profound  
44  
45 emergency workup is needed irrespective of the triage level to distinguish patients who  
46  
47 could be discharged (but still may have required emergency treatment) from those  
48  
49 qualifying for admission.  
50  
51  
52  
53  
54  
55  
56  
57  
58  
59  
60

1  
2 The novelty about our data is the evaluation of the specialty group according to the  
3  
4 presenting chief complaint in addition to ESI in a large number of emergency patients.  
5  
6 Literature on ESI for specific patient groups is limited and usually restricted either to  
7  
8 specific diseases or symptoms<sup>19 20</sup> or focussed on age groups such as adults, geriatric or  
9  
10 paediatric patients.<sup>10 13</sup> Different specialties within one interdisciplinary study cohort have –  
11  
12 to best of our knowledge – not been investigated before. The differences we found for the  
13  
14 predicative power of ESI in some specialty groups need particular attention. We observed  
15  
16 that required ICU capacities differed among patients with neurological or medical  
17  
18 symptoms and patients with surgical symptoms. This could be of practical relevance:  
19  
20 Knowing the responsible specialty group in case of an admission is essential in Germany,  
21  
22 as wards are usually restricted to specific specialties and therefore patients cannot be  
23  
24 assigned to any available bed within a hospital.  
25  
26  
27  
28  
29  
30  
31

32 Patients with symptoms belonging to neurosurgery, neurology and internal medicine had  
33  
34 high admission rates and ESI only poorly predicted the need for in-hospital care in  
35  
36 neurological and neurosurgical patients with high ESI scores. First of all, the high  
37  
38 admission rates in these specialties might be a result of the limited emergency workup  
39  
40 capacities for the underlying diseases, which may lead to hospital admission for more  
41  
42 elaborate investigation. Also, selection bias is likely as a large number of neurological  
43  
44 patients with medium or low priority ESI scores was referred to our ED by practitioners  
45  
46 (9% of ESI 3, 10% of ESI 4 and 8% of ESI 5 in neurological patients vs. 6% of ESI 3, 5%  
47  
48 of ESI 4 and 2% of ESI 5 in general). The relatively high rate of neurological admissions to  
49  
50 IMC is in part a result of the need for stroke unit care in many of these patients. Some  
51  
52 attempts were made to overcome the limitations of the most common triage systems for  
53  
54 neurological patients. One triage system designed for patients with neurological  
55  
56 complaints to identify those with urgent need for medical treatment, thereby reducing  
57  
58  
59  
60



1  
2 resource consumption and duration of treatment is the Heidelberg Neurological Triage  
3  
4 System (HEINTS).<sup>21 22</sup> This neuro-specific triage system has been evaluated in a highly  
5  
6 specialized neurological ED but also in an interdisciplinary emergency setting. However,  
7  
8 study periods were short, the number of patients was limited and the restriction to four  
9  
10 levels might affect its applicability in large EDs where 5-level triage scores are standard.<sup>2</sup>  
11  
12 The authors made a great effort to integrate the score into ESI but this still needs  
13  
14 evaluation.<sup>22</sup> Overall, it seems not feasible to use specialty specific triage systems in large  
15  
16 multidisciplinary EDs. However, for some diseases like sepsis, combination of ESI with  
17  
18 shock index or quick sepsis-related organ failure assessment (qSOFA) might improve  
19  
20 validity and mortality.<sup>20 23</sup> Whether ESI triage for neurological patients might be improved  
21  
22 by adding neurological scores, e.g. Glasgow Coma Scale (GCS) or the face arm speech  
23  
24 test (FAST), still needs to be evaluated.  
25  
26  
27  
28  
29  
30  
31

32 There are several limitations of our study. First of all, data was collected retrospectively  
33  
34 and at a single tertiary care university hospital. Therefore our results cannot be  
35  
36 generalised. Selection bias might have influenced the patient mix as a significant number  
37  
38 of patients presents to the ED for specialized advice according to long-term treatment at  
39  
40 the hospital. Our emergency setup includes the frequent use of specialized consultations,  
41  
42 diagnostics and treatment at any time to avoid admission. As a consequence of the  
43  
44 extended workup in the ED, admission rates might be lower than in other hospitals.  
45  
46 Besides, resource consumption within the ED and discharged patients were not further  
47  
48 analysed. However, this was not the aim of our investigation and has already been  
49  
50 addressed by previous studies.<sup>24</sup> Furthermore, we did not control for other risk factors  
51  
52 such as age or pre-existing illness. And, last but not least, other triage scales besides ESI  
53  
54 were not evaluated, but would have been of major interest with regards to the variety of  
55  
56 triage systems in use and the ambition for an international comparability.<sup>3</sup>  
57  
58  
59  
60

## CONCLUSION

There are various approaches that aim to improve coordination of ED care by reducing time for triage, treatment and transfer of patients.<sup>25-28</sup> Our work suggests that ESI might be a promising tool to improve coordination of care by predicting type and amount of hospital beds required for specific ED patient groups. Patients with symptoms pointing at neurological problems need particular attention as ESI failed to sufficiently predict the care facility level needed in this patient group.

1  
2 **Acknowledgments:** We thank Edin Hedzic for his contribution to acquire the data.  
3

4 **Contributors:** Study concept and design were developed by SV and MK. Acquisition of  
5  
6 data was done by SV. MK, SH, AB, JD, UK and HWP were responsible for the  
7  
8 interpretation of data and critical revision of the manuscript.  
9

10  
11 **Funding:** This research did not receive any specific grant from funding agencies in public,  
12  
13 commercial, or not-for-profit sectors.  
14

15  
16 **Competing interests:** The authors declare that they have no conflicts of interest  
17  
18 regarding the publication of this article.  
19

20 **Patient consent for publication:** Not applicable.  
21

22 **Ethics approval:** The study was approved by the Ethics Committee of the University of  
23  
24 Munich (project number 18-409).  
25  
26

27 **Data availability statement:** Original data are available upon reasonable request.  
28  
29  
30  
31  
32  
33  
34  
35  
36  
37  
38  
39  
40  
41  
42  
43  
44  
45  
46  
47  
48  
49  
50  
51  
52  
53  
54  
55  
56  
57  
58  
59  
60

1  
2  
3  
4  
5  
6  
7  
8  
9  
10  
11  
12  
13  
14  
15  
16  
17  
18  
19  
20  
21  
22  
23  
24  
25  
26  
27  
28  
29  
30  
31  
32  
33  
34  
35  
36  
37  
38  
39  
40  
41  
42  
43  
44  
45  
46  
47  
48  
49  
50  
51  
52  
53  
54  
55  
56  
57  
58  
59  
60

## REFERENCES

1. Consensus statement on the triage of critically ill patients. Society of Critical Care Medicine Ethics Committee. *JAMA* 1994;271(15):1200-3.
2. Kuriyama A, Urushidani S, Nakayama T. Five-level emergency triage systems: variation in assessment of validity. *Emerg Med J* 2017;34(11):703-10. doi: 10.1136/emmermed-2016-206295
3. FitzGerald G, Jelinek GA, Scott D, et al. Emergency department triage revisited. *Emerg Med J* 2010;27(2):86-92. doi: 10.1136/emj.2009.077081
4. Beveridge R. CAEP issues. The Canadian Triage and Acuity Scale: a new and critical element in health care reform. Canadian Association of Emergency Physicians. *J Emerg Med* 1998;16(3):507-11. doi: 10.1016/s0736-4679(98)00031-6
5. Mackway-Jones K. *Emergency Triage: Manchester Triage Group*. BMJ Publishing Group 1997
6. Mirhaghi A, Heydari A, Mazlom R, et al. Reliability of the Emergency Severity Index: Meta-analysis. *Sultan Qaboos Univ Med J* 2015;15(1):e71-7.
7. Wuerz RC, Milne LW, Eitel DR, et al. Reliability and validity of a new five-level triage instrument. *Acad Emerg Med* 2000;7(3):236-42. doi: 10.1111/j.1553-2712.2000.tb01066.x
8. Esmailian M, Zamani M, Azadi F, et al. Inter-Rater Agreement of Emergency Nurses and Physicians in Emergency Severity Index (ESI) Triage. *Emerg (Tehran)* 2014;2(4):158-61.
9. Fong RY, Glen WSS, Mohamed Jamil AK, et al. Comparison of the Emergency Severity Index versus the Patient Acuity Category Scale in an emergency setting. *Int Emerg Nurs* 2018 doi: 10.1016/j.ienj.2018.05.001

- 1  
2 10. Travers DA, Waller AE, Katznelson J, et al. Reliability and validity of the emergency  
3  
4 severity index for pediatric triage. *Acad Emerg Med* 2009;16(9):843-9. doi:  
5  
6 10.1111/j.1553-2712.2009.00494.x  
7
- 8  
9 11. Platts-Mills TF, Travers D, Biese K, et al. Accuracy of the Emergency Severity Index  
10  
11 triage instrument for identifying elder emergency department patients receiving an  
12  
13 immediate life-saving intervention. *Acad Emerg Med* 2010;17(3):238-43. doi:  
14  
15 10.1111/j.1553-2712.2010.00670.x  
16
- 17  
18 12. Storm-Versloot MN, Ubbink DT, Kappelhof J, et al. Comparison of an informally  
19  
20 structured triage system, the emergency severity index, and the manchester triage  
21  
22 system to distinguish patient priority in the emergency department. *Acad Emerg Med*  
23  
24 2011;18(8):822-9. doi: 10.1111/j.1553-2712.2011.01122.x  
25
- 26  
27 13. Grossmann FF, Zumbunn T, Frauchiger A, et al. At risk of undertriage? Testing the  
28  
29 performance and accuracy of the emergency severity index in older emergency  
30  
31 department patients. *Ann Emerg Med* 2012;60(3):317-25 e3. doi:  
32  
33 10.1016/j.annemergmed.2011.12.013  
34
- 35  
36 14. Ruger JP, Richter CJ, Lewis LM. Clinical and economic factors associated with  
37  
38 ambulance use to the emergency department. *Acad Emerg Med* 2006;13(8):879-85.  
39  
40 doi: 10.1197/j.aem.2006.04.006  
41
- 42  
43 15. Bosia T, Malinowska A, Weigel K, et al. Risk of adverse outcome in patients referred by  
44  
45 emergency medical services in Switzerland. *Swiss Med Wkly* 2017;147:w14554. doi:  
46  
47 10.4414/smw.2017.14554  
48
- 49  
50 16. van der Wulp I, Schrijvers AJ, van Stel HF. Predicting admission and mortality with the  
51  
52 Emergency Severity Index and the Manchester Triage System: a retrospective  
53  
54 observational study. *Emerg Med J* 2009;26(7):506-9. doi: 10.1136/emj.2008.063768  
55  
56  
57  
58  
59  
60

- 1  
2 17. Zachariasse JM, van der Hagen V, Seiger N, et al. Performance of triage systems in  
3  
4 emergency care: a systematic review and meta-analysis. *BMJ Open*  
5  
6 2019;9(5):e026471. doi: 10.1136/bmjopen-2018-026471  
7
- 8  
9 18. Pearson C, Kim DS, Mika VH, et al. Emergency department visits in patients with low  
10  
11 acuity conditions: Factors associated with resource utilization. *Am J Emerg Med*  
12  
13 2018;36(8):1327-31. doi: 10.1016/j.ajem.2017.12.033  
14
- 15  
16 19. Pouyamehr A, Mirhaghi A, Sharifi MD, et al. Comparison between Emergency Severity  
17  
18 Index and Heart Failure Triage Scale in heart failure patients: A randomized clinical trial.  
19  
20 *World J Emerg Med* 2019;10(4):215-21. doi: 10.5847/wjem.j.1920-8642.2019.04.004  
21
- 22  
23 20. Kwak H, Suh GJ, Kim T, et al. Prognostic performance of Emergency Severity Index  
24  
25 (ESI) combined with qSOFA score. *Am J Emerg Med* 2018;36(10):1784-88. doi:  
26  
27 10.1016/j.ajem.2018.01.088  
28
- 29  
30 21. Hoyer C, Stein P, Ebert A, et al. Comparing Expert and Non-Expert Assessment of  
31  
32 Patients Presenting with Neurological Symptoms to the Emergency Department: A  
33  
34 Retrospective Observational Study. *Neuropsychiatr Dis Treat* 2020;16:447-56. doi:  
35  
36 10.2147/NDT.S236160  
37
- 38  
39 22. Oßwald HM, Harenberg L, Jaschonek H, et al. Development and validation of the  
40  
41 Heidelberg Neurological Triage System (HEINTS). *Journal of Neurology*  
42  
43 2019;266(11):2685-98. doi: 10.1007/s00415-019-09472-0  
44
- 45  
46 23. Torabi M, Moeinaddini S, Mirafzal A, et al. Shock index, modified shock index, and age  
47  
48 shock index for prediction of mortality in Emergency Severity Index level 3. *Am J Emerg*  
49  
50 *Med* 2016;34(11):2079-83. doi: 10.1016/j.ajem.2016.07.017  
51
- 52  
53 24. Tanabe P, Gimbel R, Yarnold PR, et al. The Emergency Severity Index (version 3) 5-  
54  
55 level triage system scores predict ED resource consumption. *J Emerg Nurs*  
56  
57 2004;30(1):22-9. doi: 10.1016/j.jen.2003.11.004  
58  
59  
60

- 1  
2 25. Vegting IL, Nanayakkara PW, van Dongen AE, et al. Analysing completion times in an  
3  
4 academic emergency department: coordination of care is the weakest link. *Neth J Med*  
5  
6 2011;69(9):392-8.  
7  
8  
9 26. De Freitas L, Goodacre S, O'Hara R, et al. Interventions to improve patient flow in  
10  
11 emergency departments: an umbrella review. *Emerg Med J* 2018;35(10):626-37. doi:  
12  
13 10.1136/emmermed-2017-207263  
14  
15  
16 27. Lauks J, Mramor B, Baumgartl K, et al. Medical Team Evaluation: Effect on  
17  
18 Emergency Department Waiting Time and Length of Stay. *PLoS One*  
19  
20 2016;11(4):e0154372. doi: 10.1371/journal.pone.0154372  
21  
22  
23 28. Villa S, Weber EJ, Polevoi S, et al. Decreasing triage time: effects of implementing a  
24  
25 step-wise ESI algorithm in an EHR. *Int J Qual Health Care* 2018;30(5):375-81. doi:  
26  
27 10.1093/intqhc/mzy056  
28  
29  
30  
31  
32  
33  
34  
35  
36  
37  
38  
39  
40  
41  
42  
43  
44  
45  
46  
47  
48  
49  
50  
51  
52  
53  
54  
55  
56  
57  
58  
59  
60

1  
2 **Figure 1: Analysis of the study population for mode of arrival (A), admission rate (B)**  
3 **and specialty according to the chief complaint (C).** Data of all patients (n=113.694)  
4 was analysed for triage results according to the Emergency Severity Index (ESI) and is  
5 illustrated for ESI 1, ESI 2, ESI 3, ESI 4 and ESI 5. Possible manners of arrival (A) were  
6 via the emergency service, by self-referral, via a practitioner and others (e.g. police). After  
7 treatment in the ED, patients were either admitted or discharged (B). For further analysis,  
8 patients were grouped to medical specialties according to their chief complaint (C): internal  
9 medicine, trauma surgery, neurology, general surgery, otorhinolaryngology, urology,  
10 orthopaedics, gynaecology or neurosurgery.  
11  
12  
13  
14  
15  
16  
17  
18  
19  
20  
21  
22  
23  
24

25 **Figure 2: Patient disposition in general and according to the responsible medical**  
26 **specialty.** Patient disposition according to ESI for all patients (A) and for patients with  
27 chief complaints pointing at problems related to internal medicine (B), neurology (C),  
28 trauma surgery (D) or general surgery (E).  
29  
30  
31  
32  
33  
34  
35  
36  
37  
38  
39  
40  
41  
42  
43  
44  
45  
46  
47  
48  
49  
50  
51  
52  
53  
54  
55  
56  
57  
58  
59  
60



**A**

**Mode of Arrival**

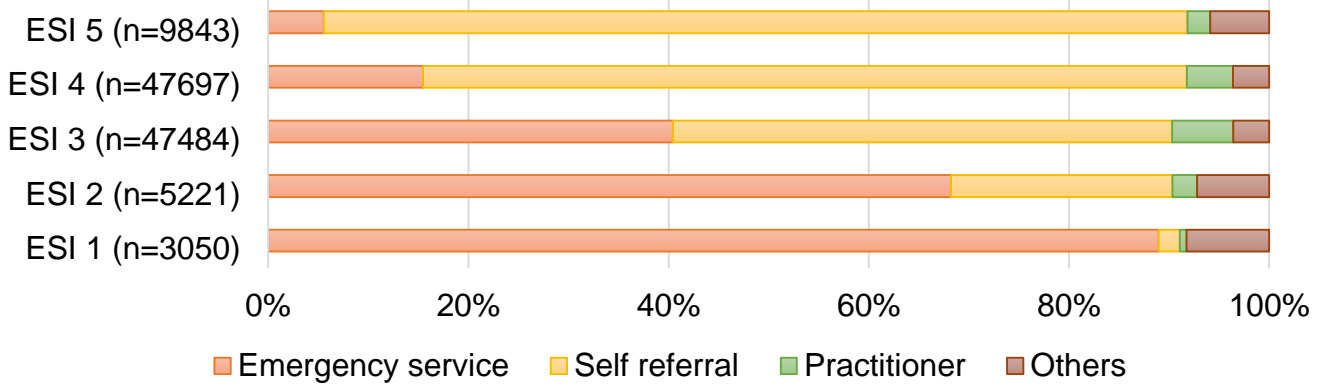

**B**

**Admission Rates**

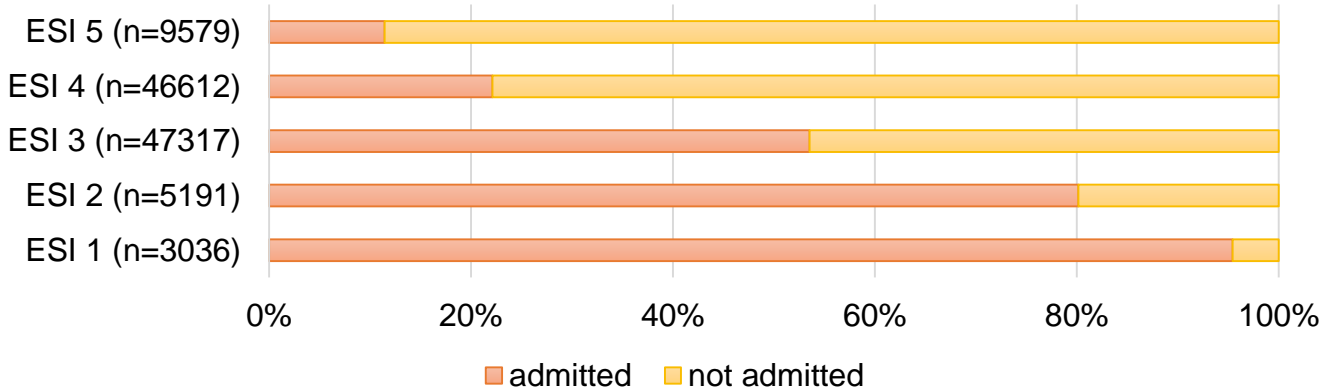

**C**

**Composition of Study Population**

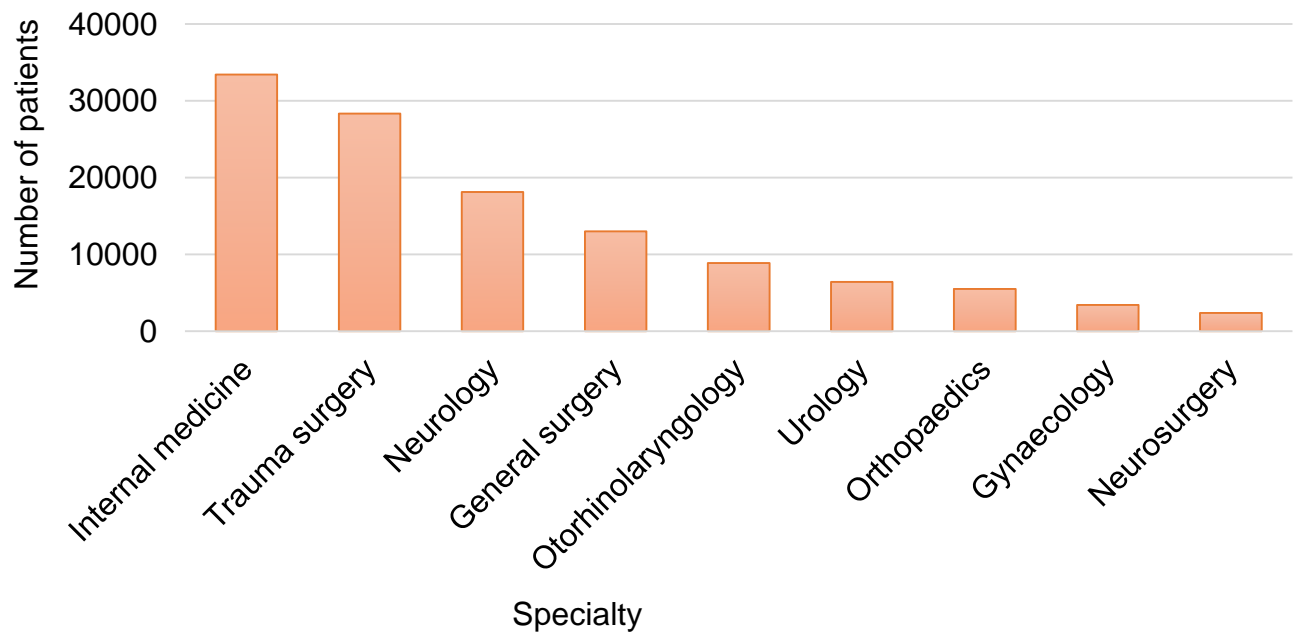

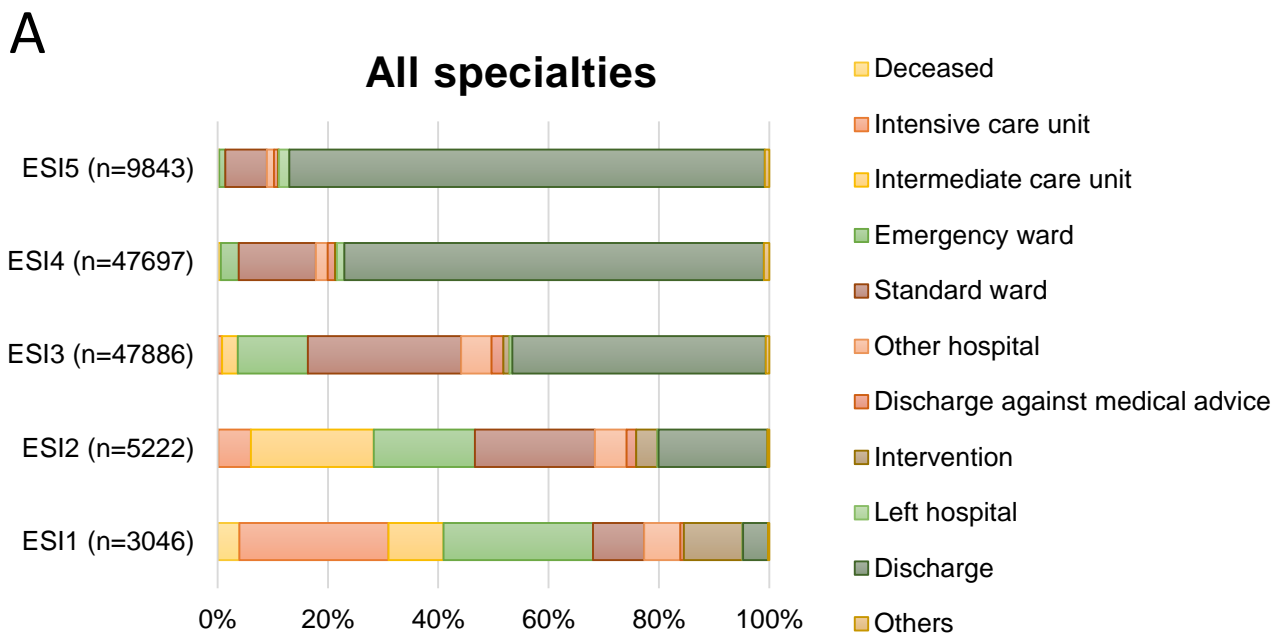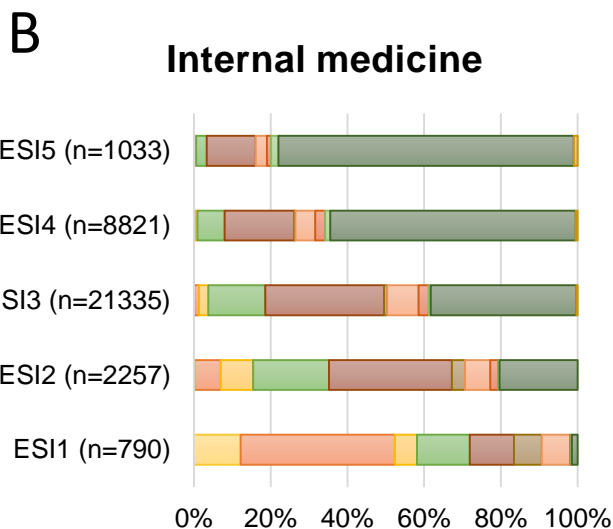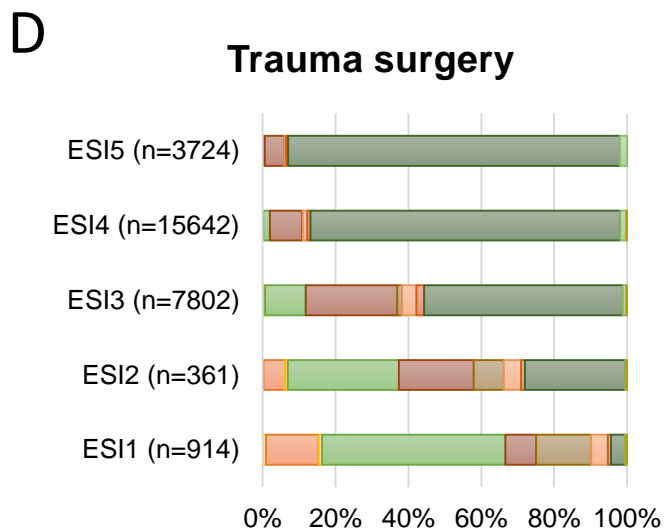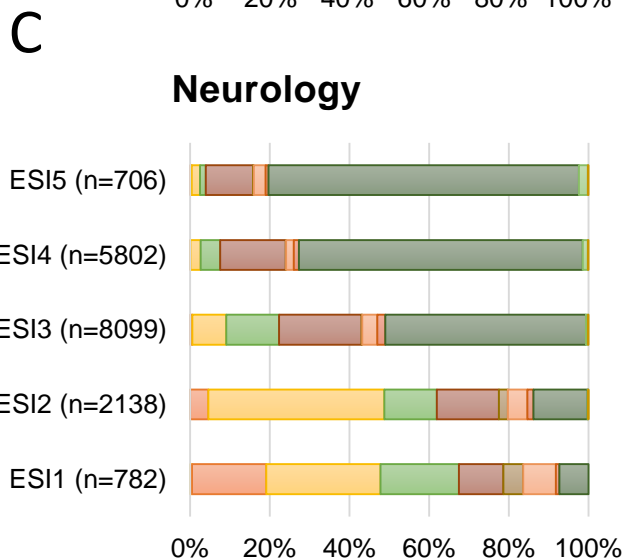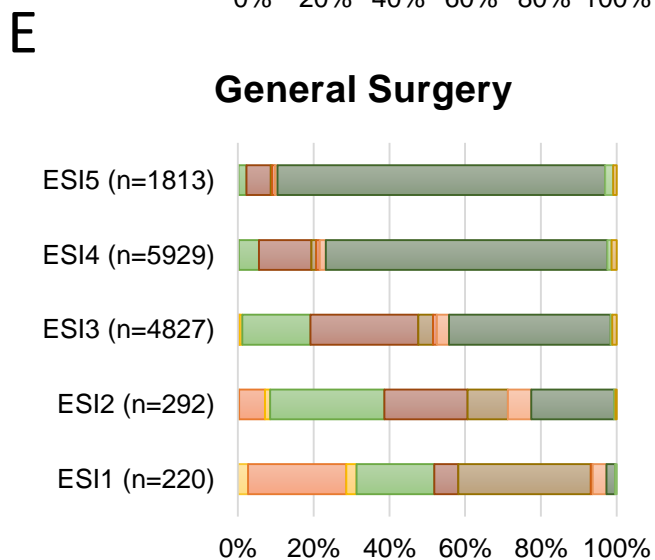

**List of all symptoms available at triage for different specialties.**

| Specialty           | Triage symptoms                                                                                                                                                                                                                                                                                                                                                                                                                                                                                           |
|---------------------|-----------------------------------------------------------------------------------------------------------------------------------------------------------------------------------------------------------------------------------------------------------------------------------------------------------------------------------------------------------------------------------------------------------------------------------------------------------------------------------------------------------|
| Internal medicine   | abdominal pain, airway problem, allergy and anaphylaxis, ascites and oedema, blood glucose derailment, cardiac arrhythmia, chest pain, coma, common cold, dehydration, diarrhoea, electrical accident, fever, flank pain, foreign material, gastrointestinal bleeding, hypertension, impaired consciousness, intoxication, jaundice, micturition problems, nausea and vomiting, other problems, problem of care, reduced general condition, resuscitation, skin and mucosal disease, swollen leg, syncope |
| Trauma surgery      | accident at work, back pain with radicular symptoms, back pain without radicular symptoms, craniocerebral injury, fall with injury, hand injury, joint problems, limb injury, muscle problem, needlestick injury, other problems, polytrauma, spinal injury, wound control                                                                                                                                                                                                                                |
| Neurology           | coma, double vision, facial palsy, gait disturbance, headache, hemiparesis, impaired consciousness, impaired vision, other problems, paraesthesia, paresis, problem of care, seizure, speech disorder, vertigo                                                                                                                                                                                                                                                                                            |
| General surgery     | acute abdominal pain, catheter and drainage complications, chest injury, flank pain, circulatory disturbance, craniocerebral injury, polytrauma, postoperative problems and controls, rectal and stoma problems, skin and soft tissue injuries, skin and soft tissue problems, transfer from other hospital                                                                                                                                                                                               |
| Otorhinolaryngology | bleeding, common cold, epistaxis, ear noise, ear pain, foreign material, hearing loss, nose injury, other problems, skin and mucosal disease, sore throat, vertigo                                                                                                                                                                                                                                                                                                                                        |
| Urology             | catheter exchange, flank pain, foreign material, micturition problem, other problems, scrotal pain, skin and mucosal disease, urological bleeding                                                                                                                                                                                                                                                                                                                                                         |
| Orthopaedics        | accident at work, back pain with radicular symptoms, back pain without radicular symptoms, craniocerebral injury, fall with injury, hand injury, joint problems, limb injury, muscle problem, needlestick injury, other problems, polytrauma, spinal injury, wound control                                                                                                                                                                                                                                |

|              |                                                                                                                                                                                                                                           |
|--------------|-------------------------------------------------------------------------------------------------------------------------------------------------------------------------------------------------------------------------------------------|
| Gynaecology  | abdominal pain, ascites and oedema, foreign material, gynaecological bleeding, morning-after pill, micturition problem, other gynaecological problems, pregnancy complications, rape, reduced general condition, skin and mucosal disease |
| Neurosurgery | back pain, headache, impaired consciousness, other problems, reduced general condition, seizure, shunt-dysfunction, wound healing disorder                                                                                                |

For peer review only

## STROBE Statement—checklist of items that should be included in reports of observational studies

|                           | Item No | Recommendation                                                                                                                                                                                                                                                                                                                                                                                                                                                         | Page No              |
|---------------------------|---------|------------------------------------------------------------------------------------------------------------------------------------------------------------------------------------------------------------------------------------------------------------------------------------------------------------------------------------------------------------------------------------------------------------------------------------------------------------------------|----------------------|
| <b>Title and abstract</b> | 1       | (a) Indicate the study's design with a commonly used term in the title or the abstract                                                                                                                                                                                                                                                                                                                                                                                 | Page 1, lines 1-2    |
|                           |         | (b) Provide in the abstract an informative and balanced summary of what was done and what was found                                                                                                                                                                                                                                                                                                                                                                    | Page 2, lines 6-20   |
| <b>Introduction</b>       |         |                                                                                                                                                                                                                                                                                                                                                                                                                                                                        |                      |
| Background/rationale      | 2       | Explain the scientific background and rationale for the investigation being reported                                                                                                                                                                                                                                                                                                                                                                                   | Page 3, lines 8 ff.  |
| Objectives                | 3       | State specific objectives, including any prespecified hypotheses                                                                                                                                                                                                                                                                                                                                                                                                       | Page 4, lines 7-9    |
| <b>Methods</b>            |         |                                                                                                                                                                                                                                                                                                                                                                                                                                                                        |                      |
| Study design              | 4       | Present key elements of study design early in the paper                                                                                                                                                                                                                                                                                                                                                                                                                | Page 4, lines 12 ff. |
| Setting                   | 5       | Describe the setting, locations, and relevant dates, including periods of recruitment, exposure, follow-up, and data collection                                                                                                                                                                                                                                                                                                                                        | Page 4, lines 12 ff. |
| Participants              | 6       | (a) <i>Cohort study</i> —Give the eligibility criteria, and the sources and methods of selection of participants. Describe methods of follow-up<br><i>Case-control study</i> —Give the eligibility criteria, and the sources and methods of case ascertainment and control selection. Give the rationale for the choice of cases and controls<br><i>Cross-sectional study</i> —Give the eligibility criteria, and the sources and methods of selection of participants | Page 4, lines 12 ff. |
|                           |         | (b) <i>Cohort study</i> —For matched studies, give matching criteria and number of exposed and unexposed<br><i>Case-control study</i> —For matched studies, give matching criteria and the number of controls per case                                                                                                                                                                                                                                                 | n/a                  |
| Variables                 | 7       | Clearly define all outcomes, exposures, predictors, potential confounders, and effect modifiers. Give diagnostic criteria, if applicable                                                                                                                                                                                                                                                                                                                               | Page 4, lines 20 ff. |
| Data sources/measurement  | 8*      | For each variable of interest, give sources of data and details of methods of assessment (measurement). Describe comparability of assessment methods if there is more than one group                                                                                                                                                                                                                                                                                   | Page 4, lines 20 ff. |
| Bias                      | 9       | Describe any efforts to address potential sources of bias                                                                                                                                                                                                                                                                                                                                                                                                              | n/a                  |
| Study size                | 10      | Explain how the study size was arrived at                                                                                                                                                                                                                                                                                                                                                                                                                              | Page 4, lines 12-18. |
| Quantitative variables    | 11      | Explain how quantitative variables were handled in the analyses. If applicable, describe which groupings were chosen and why                                                                                                                                                                                                                                                                                                                                           | n/a                  |
| Statistical methods       | 12      | (a) Describe all statistical methods, including those used to control for confounding                                                                                                                                                                                                                                                                                                                                                                                  | Page 5, lines 4-9    |

1  
2  
3  
4  
5  
6  
7  
8  
9  
10  
11  
12  
13  
14  
15  
16  
17  
18  
19  
20  
21  
22  
23  
24  
25  
26  
27  
28  
29  
30  
31  
32  
33  
34  
35  
36  
37  
38  
39  
40  
41  
42  
43  
44  
45  
46  
47  
48  
49  
50  
51  
52  
53  
54  
55  
56  
57  
58  
59  
60

|                                                                                                                                                                                                                                                                                                           |                           |
|-----------------------------------------------------------------------------------------------------------------------------------------------------------------------------------------------------------------------------------------------------------------------------------------------------------|---------------------------|
| (b) Describe any methods used to examine subgroups and interactions                                                                                                                                                                                                                                       | Page 5,<br>lines 4-<br>10 |
| (c) Explain how missing data were addressed                                                                                                                                                                                                                                                               | n/a                       |
| (d) <i>Cohort study</i> —If applicable, explain how loss to follow-up was addressed<br><i>Case-control study</i> —If applicable, explain how matching of cases and controls was addressed<br><i>Cross-sectional study</i> —If applicable, describe analytical methods taking account of sampling strategy | n/a                       |
| (e) Describe any sensitivity analyses                                                                                                                                                                                                                                                                     | n/a                       |

Continued on next page

For peer review only

| <b>Results</b>           |     |                                                                                                                                                                                                              |                       |
|--------------------------|-----|--------------------------------------------------------------------------------------------------------------------------------------------------------------------------------------------------------------|-----------------------|
| Participants             | 13* | (a) Report numbers of individuals at each stage of study—eg numbers potentially eligible, examined for eligibility, confirmed eligible, included in the study, completing follow-up, and analysed            | Page 5, lines 16 ff.  |
|                          |     | (b) Give reasons for non-participation at each stage                                                                                                                                                         | n/a                   |
|                          |     | (c) Consider use of a flow diagram                                                                                                                                                                           | n/a                   |
| Descriptive data         | 14* | (a) Give characteristics of study participants (eg demographic, clinical, social) and information on exposures and potential confounders                                                                     | Page 5, lines 16 ff.  |
|                          |     | (b) Indicate number of participants with missing data for each variable of interest                                                                                                                          | n/a                   |
|                          |     | (c) <i>Cohort study</i> —Summarise follow-up time (eg, average and total amount)                                                                                                                             | n/a                   |
| Outcome data             | 15* | <i>Cohort study</i> —Report numbers of outcome events or summary measures over time                                                                                                                          | n/a                   |
|                          |     | <i>Case-control study</i> —Report numbers in each exposure category, or summary measures of exposure                                                                                                         | n/a                   |
|                          |     | <i>Cross-sectional study</i> —Report numbers of outcome events or summary measures                                                                                                                           | n/a                   |
| Main results             | 16  | (a) Give unadjusted estimates and, if applicable, confounder-adjusted estimates and their precision (eg, 95% confidence interval). Make clear which confounders were adjusted for and why they were included | n/a                   |
|                          |     | (b) Report category boundaries when continuous variables were categorized                                                                                                                                    | n/a                   |
|                          |     | (c) If relevant, consider translating estimates of relative risk into absolute risk for a meaningful time period                                                                                             | n/a                   |
| Other analyses           | 17  | Report other analyses done—eg analyses of subgroups and interactions, and sensitivity analyses                                                                                                               | Page 8, lines 22 ff.  |
| <b>Discussion</b>        |     |                                                                                                                                                                                                              |                       |
| Key results              | 18  | Summarise key results with reference to study objectives                                                                                                                                                     | Page 9, lines 7 ff.   |
| Limitations              | 19  | Discuss limitations of the study, taking into account sources of potential bias or imprecision. Discuss both direction and magnitude of any potential bias                                                   | Page 13, lines 14-26  |
| Interpretation           | 20  | Give a cautious overall interpretation of results considering objectives, limitations, multiplicity of analyses, results from similar studies, and other relevant evidence                                   | Page 10, lines 15 ff. |
| Generalisability         | 21  | Discuss the generalisability (external validity) of the study results                                                                                                                                        | Page 13, line 14-16.  |
| <b>Other information</b> |     |                                                                                                                                                                                                              |                       |
| Funding                  | 22  | Give the source of funding and the role of the funders for the present study and, if applicable, for the original study on which the present article is based                                                | P. 15, lines 5-6      |

\*Give information separately for cases and controls in case-control studies and, if applicable, for exposed and unexposed groups in cohort and cross-sectional studies.

**Note:** An Explanation and Elaboration article discusses each checklist item and gives methodological background and published examples of transparent reporting. The STROBE checklist is best used in conjunction with this article (freely available on the Web sites of PLoS Medicine at <http://www.plosmedicine.org/>, Annals of Internal Medicine at <http://www.annals.org/>, and Epidemiology at <http://www.epidem.com/>). Information on the STROBE Initiative is available at [www.strobe-statement.org](http://www.strobe-statement.org).
