# Supplementary material for: Patient disposition using the Emergency Severity Index: a retrospective observational study at an interdisciplinary emergency department
Source: PubMed Central journal article supplement — BMJ Open. 2022 May 11;12(5):e057684. doi: 10.1136/bmjopen-2021-057684 (PMC9109098; doi:10.1136/bmjopen-2021-057684), 2022-05-11
Supplement: bmjopen-2021-057684supp001.pdf [file bmjopen-2021-057684supp001.pdf]

**List of all symptoms available at triage for different specialties.**

| <b>Specialty</b>    | <b>Triage symptoms</b>                                                                                                                                                                                                                                                                                                                                                                                                                                                                                    |
|---------------------|-----------------------------------------------------------------------------------------------------------------------------------------------------------------------------------------------------------------------------------------------------------------------------------------------------------------------------------------------------------------------------------------------------------------------------------------------------------------------------------------------------------|
| Internal medicine   | abdominal pain, airway problem, allergy and anaphylaxis, ascites and oedema, blood glucose derailment, cardiac arrhythmia, chest pain, coma, common cold, dehydration, diarrhoea, electrical accident, fever, flank pain, foreign material, gastrointestinal bleeding, hypertension, impaired consciousness, intoxication, jaundice, micturition problems, nausea and vomiting, other problems, problem of care, reduced general condition, resuscitation, skin and mucosal disease, swollen leg, syncope |
| Trauma surgery      | accident at work, back pain with radicular symptoms, back pain without radicular symptoms, craniocerebral injury, fall with injury, hand injury, joint problems, limb injury, muscle problem, needlestick injury, other problems, polytrauma, spinal injury, wound control                                                                                                                                                                                                                                |
| Neurology           | coma, double vision, facial palsy, gait disturbance, headache, hemiparesis, impaired consciousness, impaired vision, other problems, paraesthesia, paresis, problem of care, seizure, speech disorder, vertigo                                                                                                                                                                                                                                                                                            |
| General surgery     | acute abdominal pain, catheter and drainage complications, chest injury, flank pain, circulatory disturbance, craniocerebral injury, polytrauma, postoperative problems and controls, rectal and stoma problems, skin and soft tissue injuries, skin and soft tissue problems, transfer from other hospital                                                                                                                                                                                               |
| Otorhinolaryngology | bleeding, common cold, epistaxis, ear noise, ear pain, foreign material, hearing loss, nose injury, other problems, skin and mucosal disease, sore throat, vertigo                                                                                                                                                                                                                                                                                                                                        |
| Urology             | catheter exchange, flank pain, foreign material, micturition problem, other problems, scrotal pain, skin and mucosal disease, urological bleeding                                                                                                                                                                                                                                                                                                                                                         |
| Orthopaedics        | accident at work, back pain with radicular symptoms, back pain without radicular symptoms, craniocerebral injury, fall with injury, hand injury, joint problems, limb injury, muscle problem, needlestick injury, other problems, polytrauma, spinal injury, wound control                                                                                                                                                                                                                                |

|              |                                                                                                                                                                                                                                           |
|--------------|-------------------------------------------------------------------------------------------------------------------------------------------------------------------------------------------------------------------------------------------|
| Gynaecology  | abdominal pain, ascites and oedema, foreign material, gynaecological bleeding, morning-after pill, micturition problem, other gynaecological problems, pregnancy complications, rape, reduced general condition, skin and mucosal disease |
| Neurosurgery | back pain, headache, impaired consciousness, other problems, reduced general condition, seizure, shunt-dysfunction, wound healing disorder                                                                                                |
